# Supplementary material for: Sympatric Recombination in Zoonotic Cryptosporidium Leads to Emergence of Populations with Modified Host Preference
Source: PubMed Central journal article supplement — Mol Biol Evol. 2022 Jul 1;39(7):msac150. doi: 10.1093/molbev/msac150 (PMC9317183; doi:10.1093/molbev/msac150), 2022-07-01
Supplement: msac150_supplementary_data.pdf [file msac150_supplementary_data.pdf]

## Supplementary Online Materials

for

### **Sympatric Recombination in Zoonotic *Cryptosporidium* Leads to Emergence of Populations with Modified Host Preference**

Tianpeng Wang, Yaqiong Guo, Dawn M. Roellig, Na Li, Mónica Santín, Jason Lombard, Martin Kváč, Doaa Naguib, Ziding Zhang\*, Yaoyu Feng\*, and Lihua Xiao\*

\***Corresponding authors:** E-mails: zidingzhang@cau.edu.cn; yyfeng@scau.edu.cn, lxiao1961@gmail.com.

#### **This PDF file includes:**

Supplementary figs. S1 to S15  
Supplementary tables S1 to S8

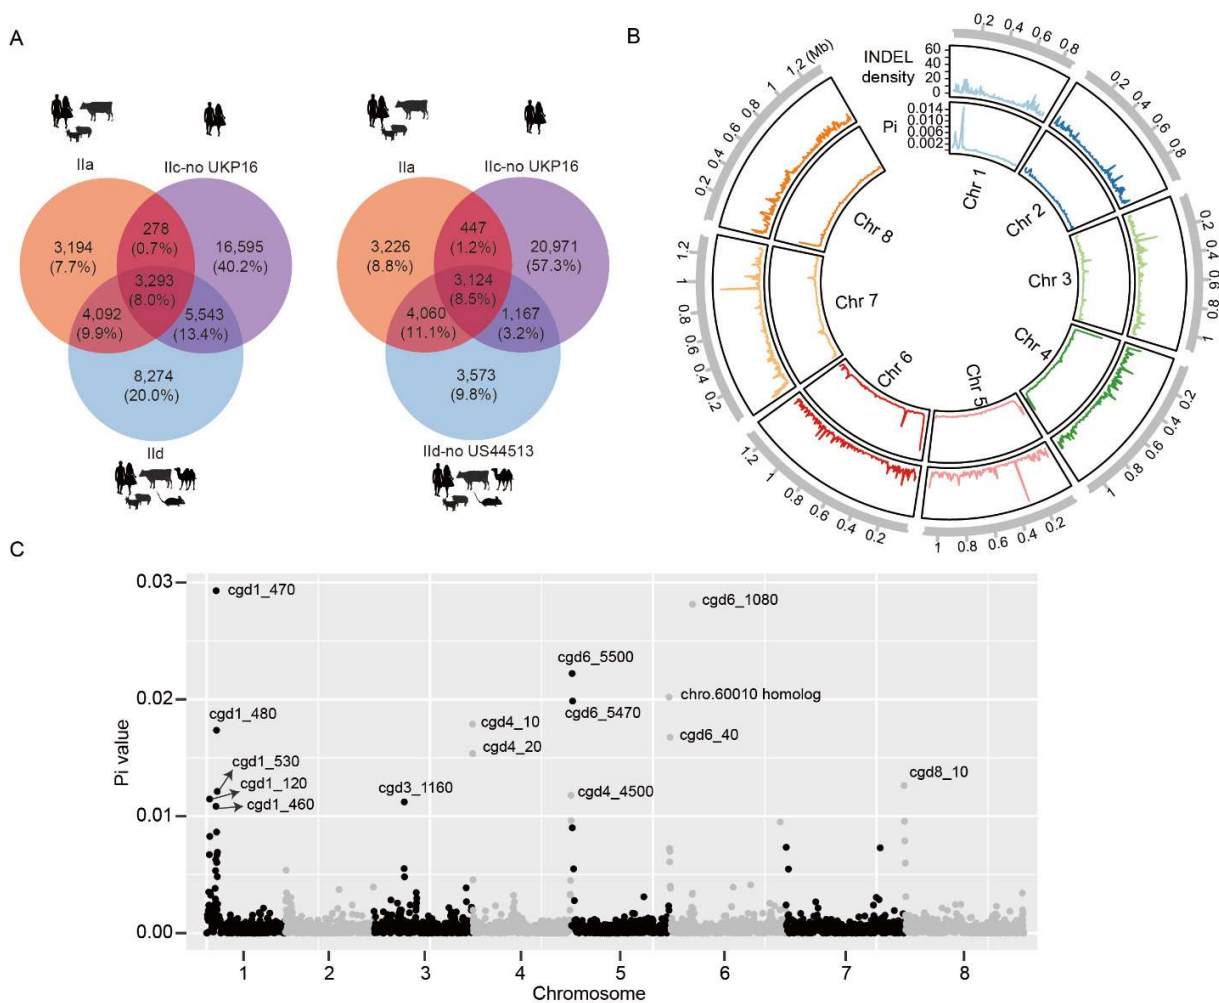

**Supplementary fig. S1. Overall genomic variation in *Cryptosporidium parvum*.** (A) Distribution of shared and subtype family-specific SNPs among three gp60 subtype families, including Ila (red), Ilc (purple) and IId (blue). The SNP distribution is displayed with the zoonotic IICa5G3j isolate UKP16 being removed from Ilc (top) and the divergent isolate US44513 removed from IId (bottom). (B) Distribution of sequence variations along the genome. INDELs density (outer) was calculated using a 5-kb sliding window, while nucleotide diversity (Pi, inner) was calculated using window size of 10 kb with step size of 5 kb. (C) Nucleotide diversity (Pi) of genes within the genomes of *C. parvum* isolates analyzed in the study. Each gene is represented as a dot and colored with grey and black alternatively corresponding to the chromosomes. The 15 genes with Pi values over 0.01 are marked with their gene IDs.

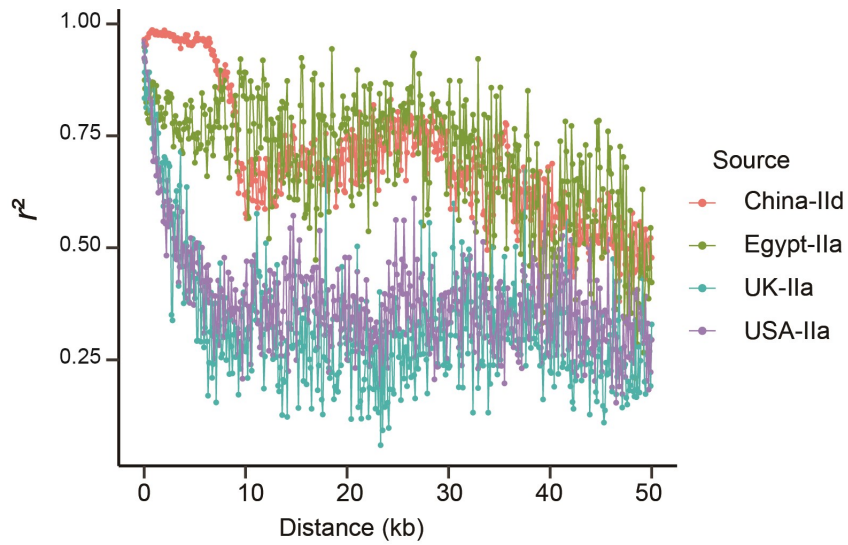

**Supplementary fig. S2. Decay of genome-wide linkage disequilibrium (LD) by genetic distance among isolates from four major sources, including China (IIId only), Egypt (IIa only), UK (IIa only) and USA (IIa only).** An equal number of samples were randomly selected from each group for LD calculation to reduce the potential influence of the sample size.

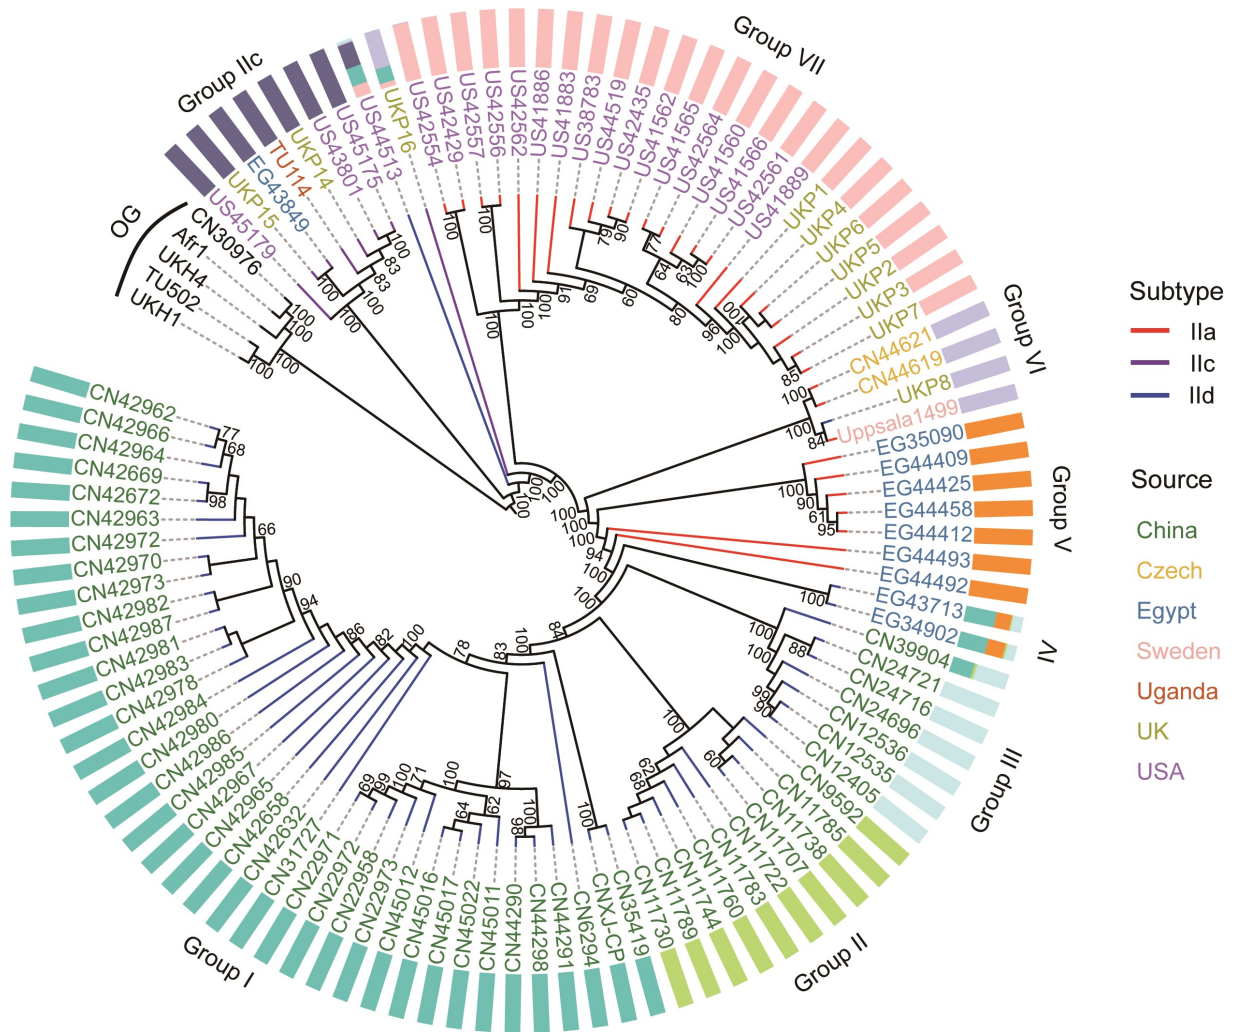

**Supplementary fig. S3. Rooted whole genomic SNPs-based maximum likelihood tree of *Cryptosporidium parvum*.** A total of 241,392 SNPs were used to build the consensus alignment. *C. hominis* was used as the outgroup (OG). The branch of each *C. parvum* isolate is colored by its *gp60* subtype, including IIa (red), IIc (purple) and IId (blue). The name of each isolate is colored by its source. Histograms outside the tree is the population structure estimated at  $K = 7$ . Subpopulations are labeled with groups I to VII and IIc.

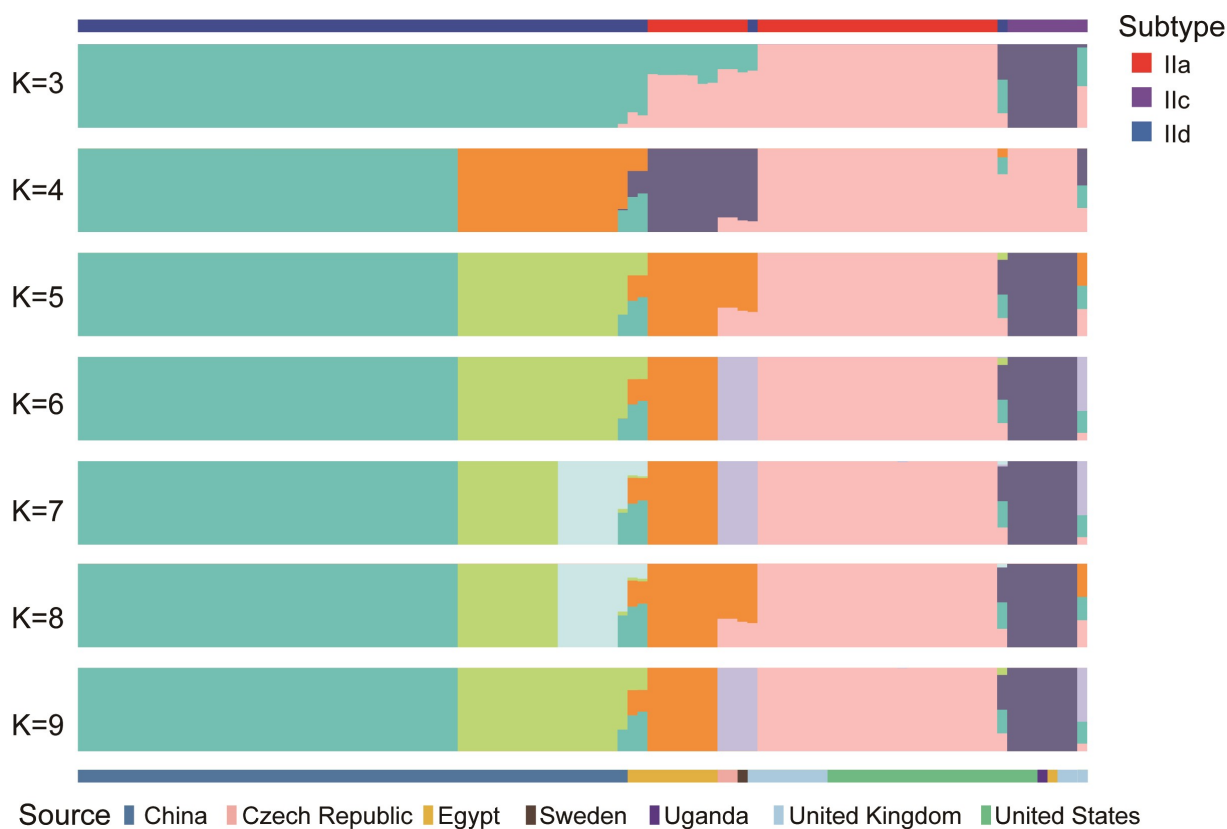

**Supplementary fig. S4. Comparisons of population structures of *Cryptosporidium parvum* inferred with different K values.** Population structures were inferred with K values of 3 to 9 using fastStructure. Each isolate is represented by a single bar in colored segments. The mosaic color bar above the histogram represents *gp60* subtypes and the one below the histogram represents the geographic origin of isolates.

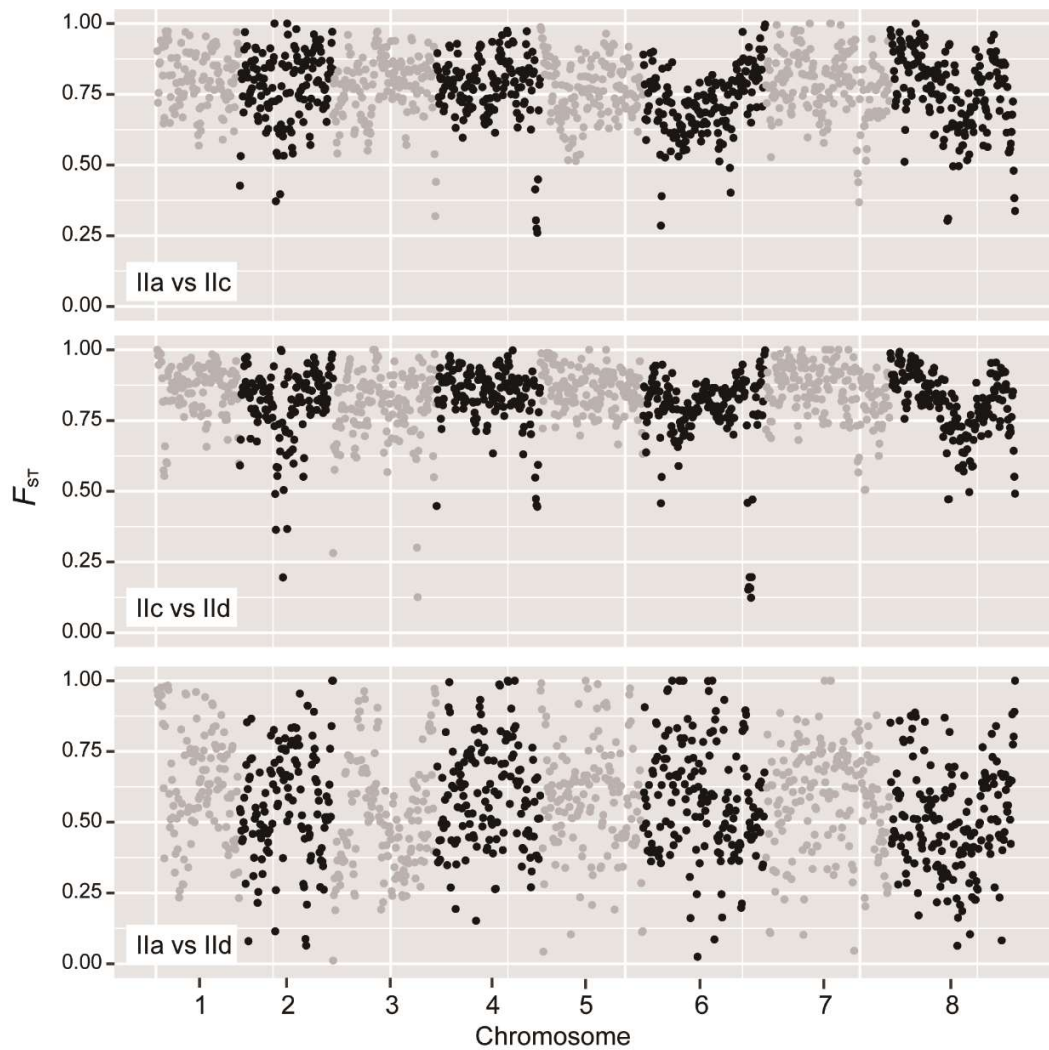

**Supplementary fig. S5. Population differentiation between groups of *Cryptosporidium parvum*.** Pair-wise  $F_{ST}$  values were calculated along the eight chromosomes (colored with grey and black alternatively) for groups of *C. parvum*. Three representative groups were selected to represent the corresponding subtype family.



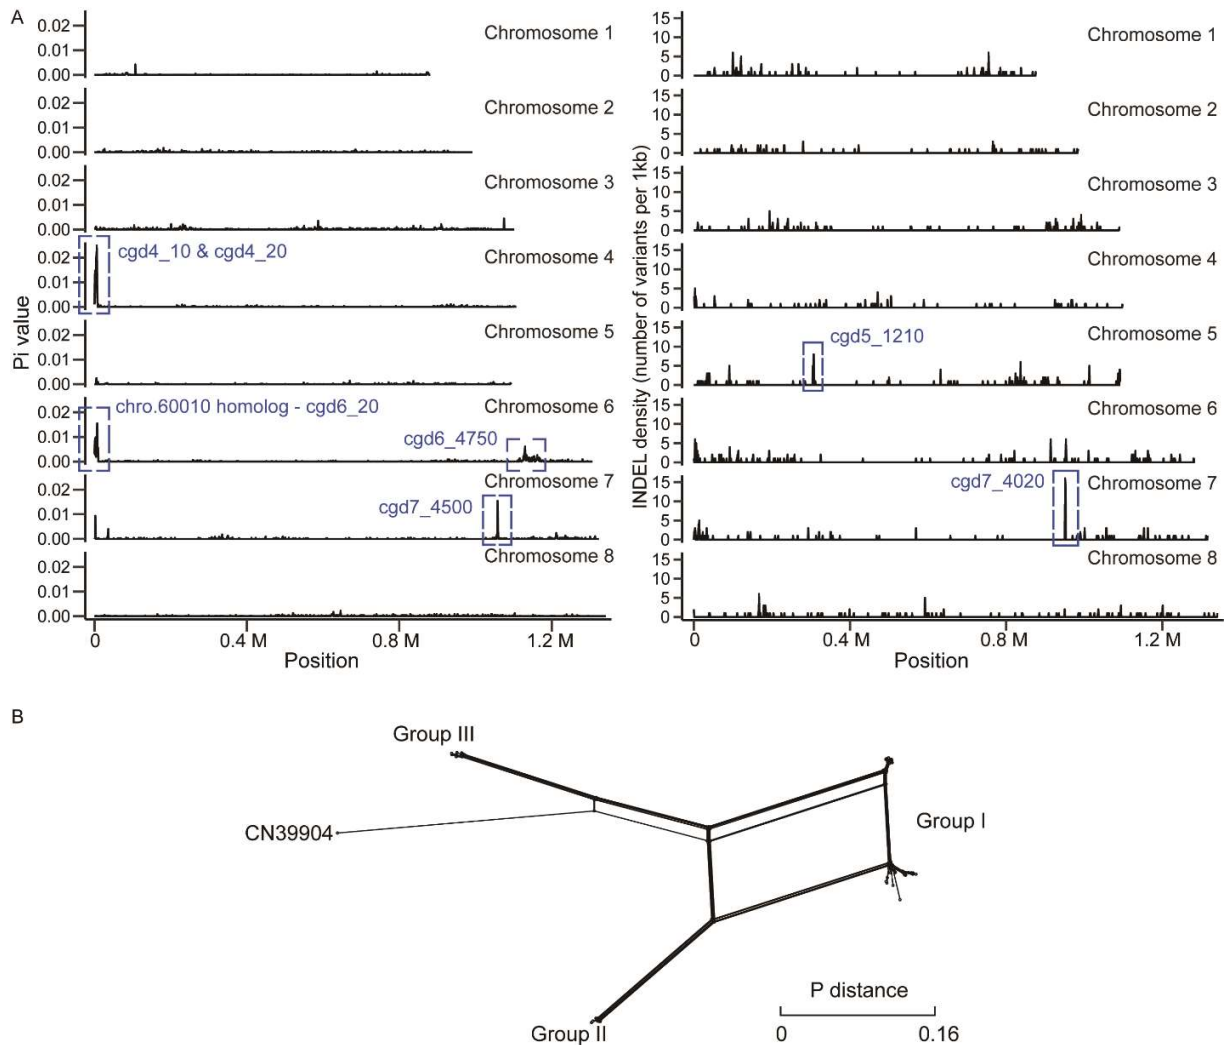

**Supplementary fig. S6. Genome diversity of *Cryptosporidium parvum* in China. (A)**

Distribution of nucleotide diversity (Pi) and INDEL density along the eight chromosomes in the genome. Statistics were calculated with a 1-kb sliding window. Highly polymorphic genes are labeled. (B) Phylogenetic network of IId isolates in China. Concatenated SNPs were used to build the network with SplitsTree. The group labels are the same as in the neighbor-joining tree of all isolates (fig. 3A). Among the isolates, group I includes those from Shanghai, Guangdong, Henan and Jiangsu, group II includes those from Heilongjiang and Inner Mongolia, group III includes those from Hebei, while CN39904 is from Xinjiang.

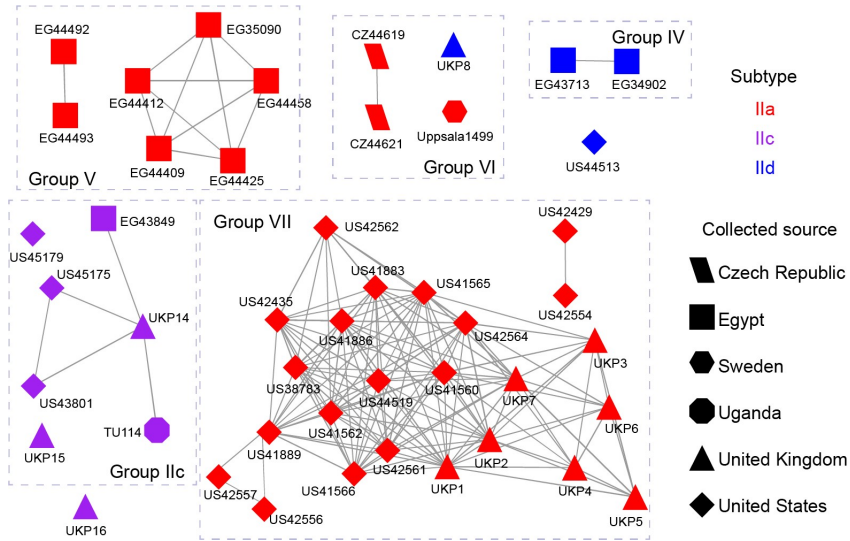

**Supplementary fig. S7. Relatedness network for pairs of *Cryptosporidium parvum* isolates from countries other than China based on Identity By Descent (IBD) sharing.** The remaining 46 genomes were used in the construction of the network with 155 edges. The edge between two nodes is linked if the IBD sharing fraction is over 90% between the genomes, indicating high genetic homology.



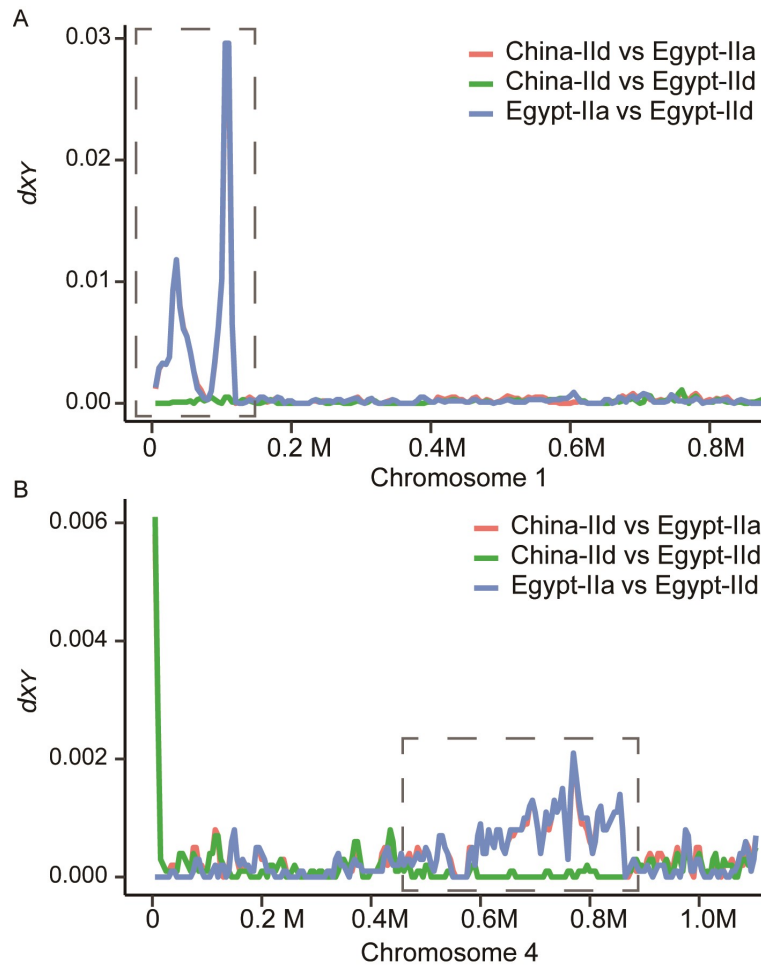

**Supplementary fig. S8. Sequence divergence in two regions in chromosomes 1 and 4 among three subpopulations of *Cryptosporidium parvum*.** (A) The IId genomes from Egypt and China are virtually identical to each other in chromosome 1 and differ from IIa genomes in Egypt in the 5' subtelomeric region. High sequence differences between IIa and IId in Egypt are also present around *cgd1\_470*, which encodes mucin 8. (B) Sequence similarity in a large region (600 k-870 k) in chromosome 4 between IId genomes from Egypt and China, with substantial sequence divergence from IIa genomes in Egypt. A 10-kb sliding window with 5-kb steps was used in the calculation of genetic divergence ( $d_{XY}$ ).

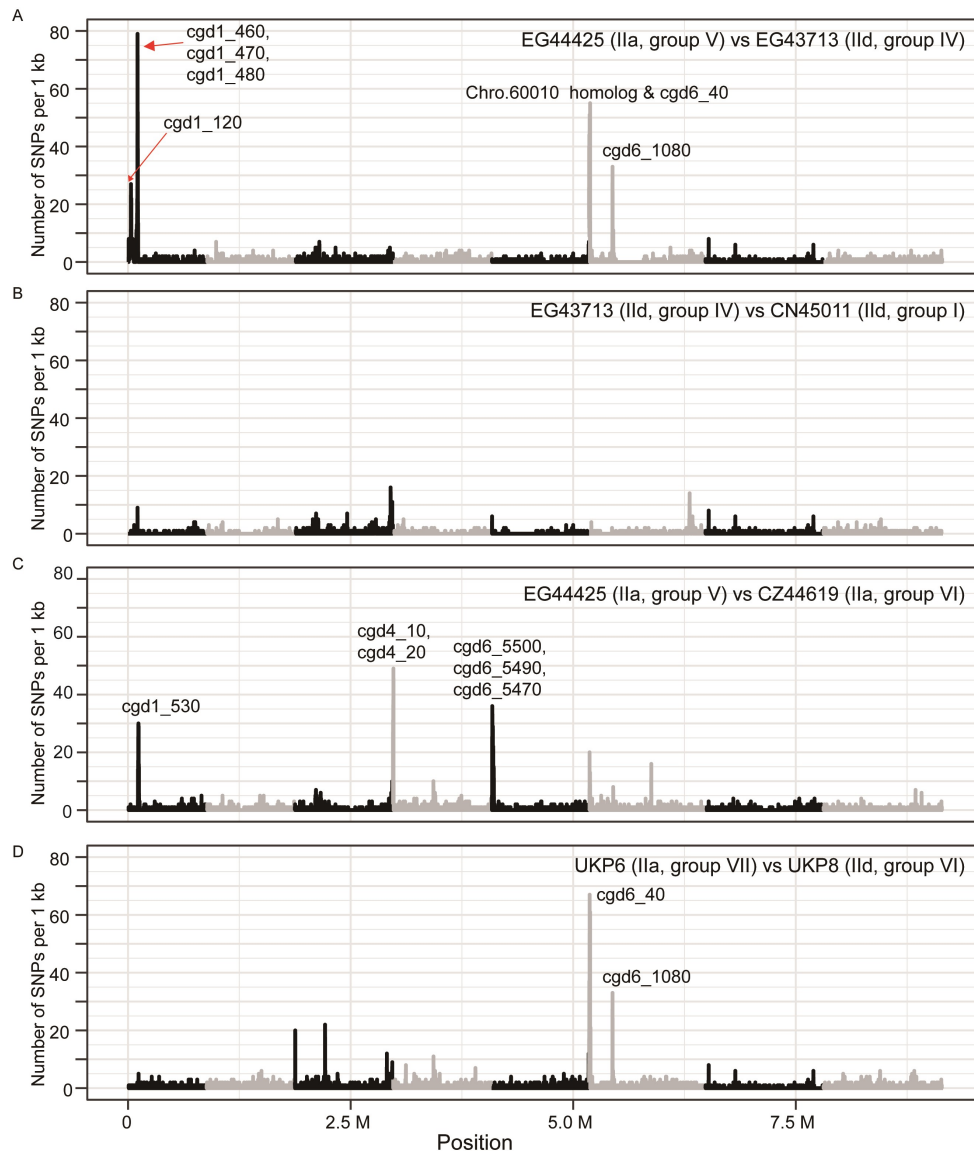

**Supplementary fig. S9. Distribution of SNPs along the concatenated genome of *Cryptosporidium parvum* between IId and IIa genomes of different groups.** Representative genomes from the different groups were used in the variant analysis, including (A) IIa genome from group V and IId genome from IV, (B) IId genomes from groups I and IV, (C) IIa genomes from groups V and VI, (D) IIa genome from group VII and IId genome from VI. SNPs between each pair were extracted using in-house python scripts from the overall dataset. The graphs were drawn with a 1-kb sliding window and the highly polymorphic genes (number of SNVs > 20/1,000 nucleotides) between the genomes under comparison are labelled with gene IDs.



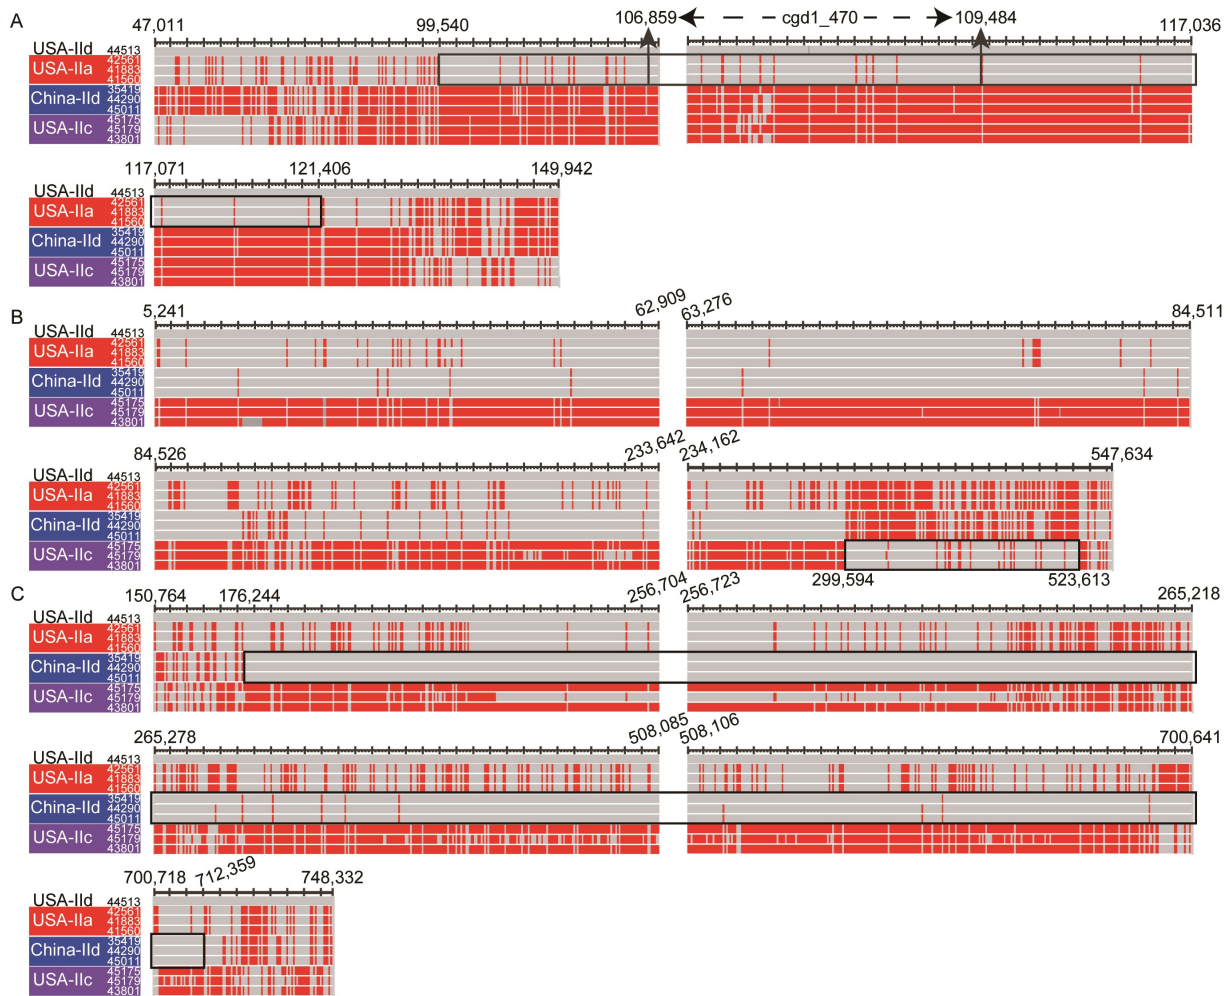

**Supplementary fig. S11. Concatenated SNP alignment of US44513 and three *gp60* subtype families of *Cryptosporidium parvum*.** (A) Concatenated SNP alignment in one area of chromosome 1 (99 k-120 k). Three genomes of each subtype family were selected from the comparison. The sequence of US44513 is placed at the top as the reference. Grey indicates sequence identity to US44513 while red indicates nucleotide substitution. A region marked with black box indicates high sequence identity between US44513 and Ia genomes, covering the gene encoded mucin glycoproteins protein (*cgd1\_470*). (B) Concatenated SNP alignment in the first 550 kb of chromosome 2. In most of the alignment, US44513 shows high identity to IId. The black box at the end indicates high sequence identity between US44513 and Ic genomes. (C) Concatenated SNP alignment in one area of chromosome 6 (15 k-750 k). The black box indicates high sequence identity between US44513 and other IId genomes.

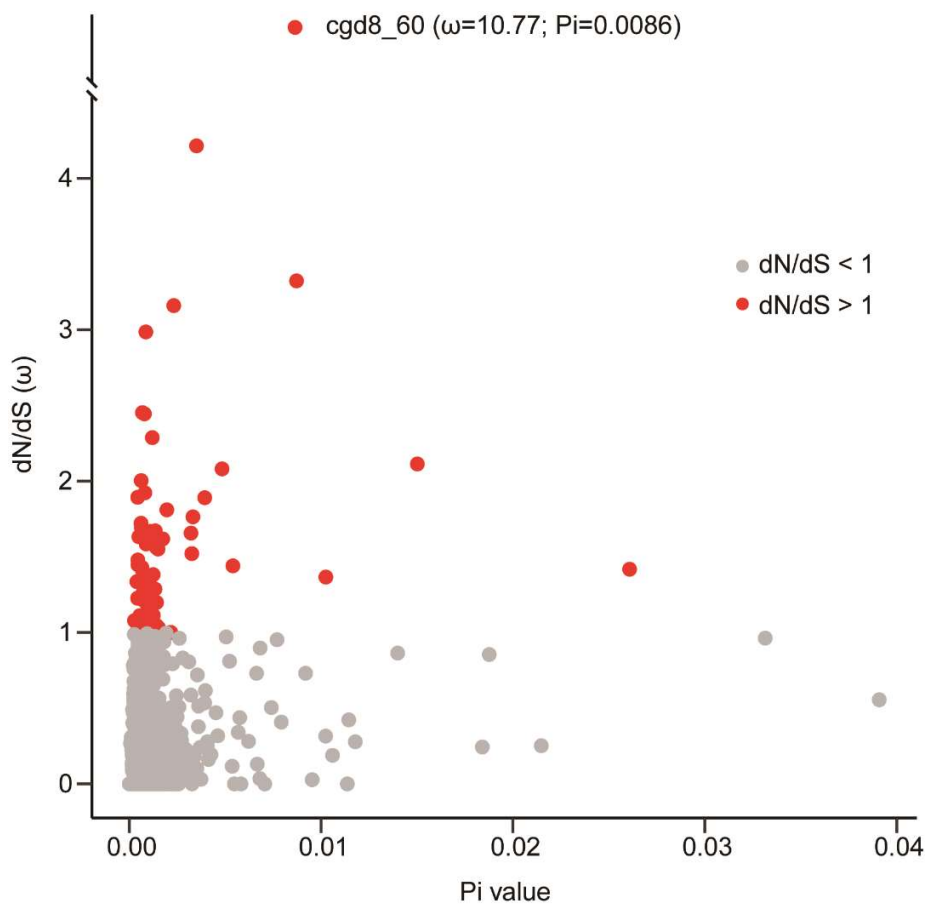

**Supplementary fig. S12. Selection pressure and nucleotide diversity of genes in *Cryptosporidium parvum*.** Each dot represents one gene. Genes extracted from 11 representative genomes were used in the analysis, with gene-based dN/dS ( $\omega$ ) and Pi values being calculated. Genes with dN/dS over 1 (in red) are thought under positive selection. Genes with dN/dS between 0 and 1 (in grey) are thought under purifying selection.

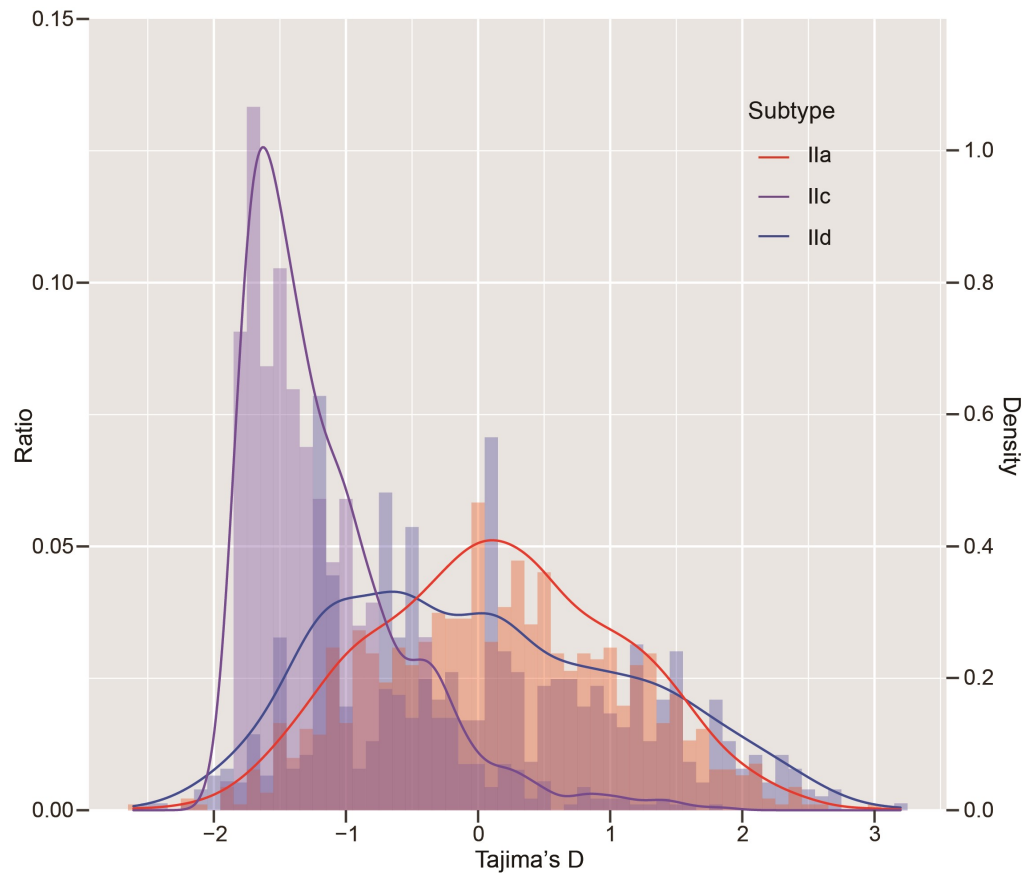

**Supplementary fig. S13. Comparison of Tajima's D distribution among three major subtype families of *Cryptosporidium parvum*.** The frequency distribution of Tajima's D values for IIc shows more negatively skewed values compared with the other two subtype families ( $P < 1e-6$  by Kruskal-Wallis test). Among them, the distribution of values in IIa is normally distributed ( $P = 0.58$  by Kolmogorov-Smirnov test). The values were calculated using VCFtools with a non-overlapping 10-kb window. For the IIId subtype family, UKP8 and US44513 were removed from the calculation to avoid biases due to the presence of considerable numbers of rare mutations in them.

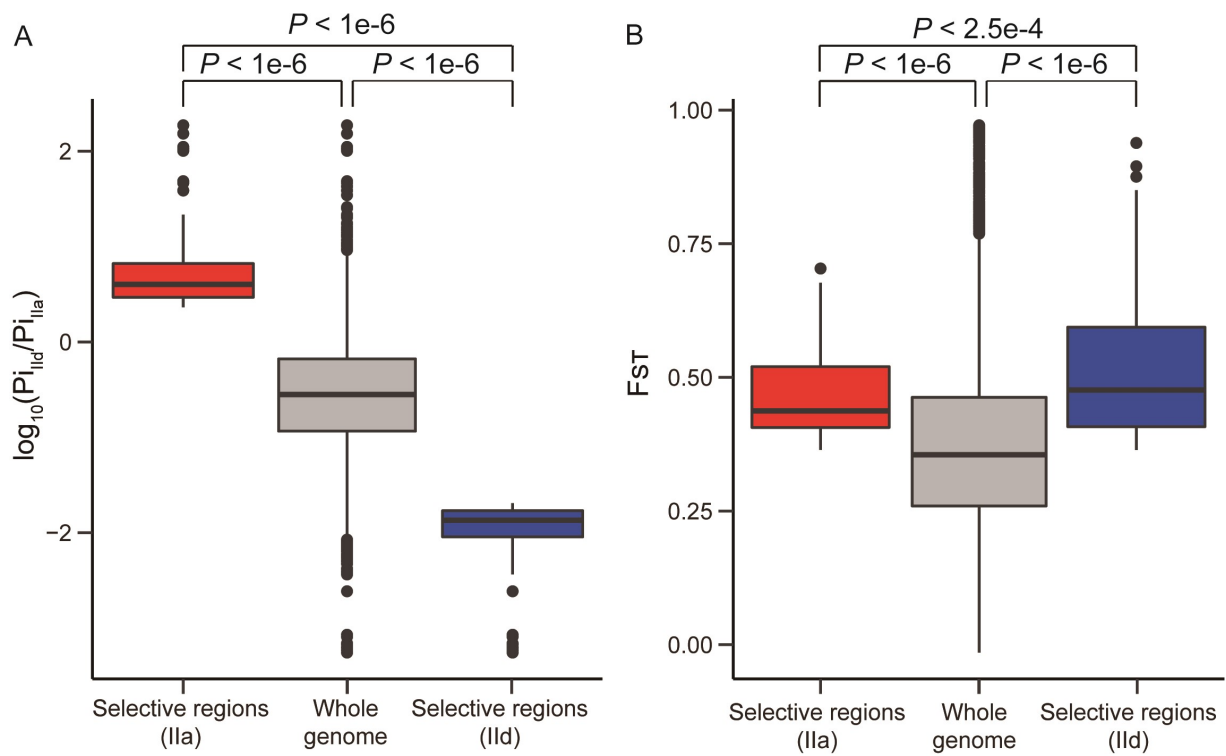

**Supplementary fig. S14. Box plot of Pi ratios (IIb/IIa) (A) and FST values (B) in regions of IIa and IIb genomes that are under selective sweep in comparison with the full genome. The statistical significance was assessed by using the Mann-Whitney U test.**



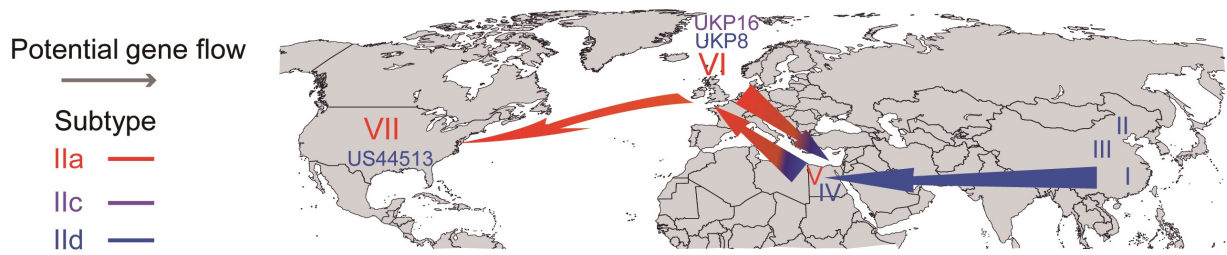

**Supplementary fig. S15. Gene flows in *Cryptosporidium parvum*.** Potential gene flow events are marked with arrowed lines colored by *gp60* subtype family to indicate the ancestral sources.

**Table S1.** Information of 112 *Cryptosporidium* spp. isolates used in this study and summary statistics of whole genome sequencing (WGS) data

| Bioproject  | Sample name                | Subtype  | Depth (×) | Mapping Coverage | Number of contigs | Assembly length(bp) | N50(bp) | Region          | Host   | SRA run     | Species          | Group |
|-------------|----------------------------|----------|-----------|------------------|-------------------|---------------------|---------|-----------------|--------|-------------|------------------|-------|
| This study  | CN42632 <sup>*,§,¶</sup>   | IIdA19G1 | 184.09    | 0.9961           | 45                | 9128551             | 524034  | China-Shanghai  | Cattle | SRR15694545 | <i>C. parvum</i> | I     |
| This study  | CN42658                    | IIdA19G1 | 332.66    | 0.9962           | 60                | 9124876             | 490577  | China-Shanghai  | Cattle | SRR15694544 | <i>C. parvum</i> | I     |
| This study  | CN42669                    | IIdA19G1 | 344.59    | 0.9961           | 59                | 9124522             | 524979  | China-Shanghai  | Cattle | SRR15694543 | <i>C. parvum</i> | I     |
| This study  | CN42672                    | IIdA19G1 | 310.71    | 0.9958           | 70                | 9127957             | 468340  | China-Shanghai  | Cattle | SRR15694542 | <i>C. parvum</i> | I     |
| This study  | CN42962                    | IIdA19G1 | 110.45    | 0.9958           | 84                | 9182750             | 281029  | China-Shanghai  | Cattle | SRR15694541 | <i>C. parvum</i> | I     |
| This study  | CN42963                    | IIdA19G1 | 313.01    | 0.9961           | 61                | 9128705             | 404983  | China-Shanghai  | Cattle | SRR15694540 | <i>C. parvum</i> | I     |
| This study  | CN42964                    | IIdA19G1 | 300.38    | 0.9962           | 40                | 9126269             | 777450  | China-Shanghai  | Cattle | SRR15694538 | <i>C. parvum</i> | I     |
| This study  | CN42965                    | IIdA19G1 | 226.89    | 0.9961           | 53                | 9129166             | 598907  | China-Shanghai  | Cattle | SRR15694537 | <i>C. parvum</i> | I     |
| This study  | CN42966                    | IIdA19G1 | 243.97    | 0.9959           | 48                | 9120749             | 488810  | China-Shanghai  | Cattle | SRR15694536 | <i>C. parvum</i> | I     |
| This study  | CN42967                    | IIdA19G1 | 314.57    | 0.9962           | 56                | 9124555             | 503195  | China-Shanghai  | Cattle | SRR15694535 | <i>C. parvum</i> | I     |
| This study  | CN42970                    | IIdA19G1 | 265.78    | 0.9962           | 54                | 9124585             | 503194  | China-Shanghai  | Cattle | SRR15694534 | <i>C. parvum</i> | I     |
| This study  | CN42972                    | IIdA19G1 | 285.83    | 0.9961           | 66                | 9125347             | 416655  | China-Shanghai  | Cattle | SRR15694533 | <i>C. parvum</i> | I     |
| This study  | CN42973 <sup>*</sup>       | IIdA19G1 | 275.52    | 0.9961           | 48                | 9126731             | 579008  | China-Shanghai  | Cattle | SRR15694532 | <i>C. parvum</i> | I     |
| This study  | CN42978                    | IIdA19G1 | 264.99    | 0.9959           | 62                | 9147499             | 410818  | China-Shanghai  | Cattle | SRR15694531 | <i>C. parvum</i> | I     |
| This study  | CN42980                    | IIdA19G1 | 268.09    | 0.9962           | 56                | 9128775             | 502860  | China-Shanghai  | Cattle | SRR15694530 | <i>C. parvum</i> | I     |
| This study  | CN42981                    | IIdA19G1 | 254.63    | 0.9963           | 44                | 9126983             | 578875  | China-Shanghai  | Cattle | SRR15694529 | <i>C. parvum</i> | I     |
| This study  | CN42982                    | IIdA19G1 | 263.15    | 0.9962           | 58                | 9121770             | 450740  | China-Shanghai  | Cattle | SRR15694527 | <i>C. parvum</i> | I     |
| This study  | CN42983                    | IIdA19G1 | 310.76    | 0.9963           | 46                | 9126704             | 502859  | China-Shanghai  | Cattle | SRR15694526 | <i>C. parvum</i> | I     |
| This study  | CN42984                    | IIdA19G1 | 213.56    | 0.9960           | 61                | 9146565             | 509977  | China-Shanghai  | Cattle | SRR15694525 | <i>C. parvum</i> | I     |
| This study  | CN42985                    | IIdA19G1 | 301.12    | 0.9960           | 46                | 9126927             | 510468  | China-Shanghai  | Cattle | SRR15694524 | <i>C. parvum</i> | I     |
| This study  | CN42986                    | IIdA19G1 | 241.38    | 0.9966           | 50                | 9128227             | 501852  | China-Shanghai  | Cattle | SRR15694523 | <i>C. parvum</i> | I     |
| This study  | CN42987                    | IIdA19G1 | 263.53    | 0.9961           | 58                | 9128378             | 345407  | China-Shanghai  | Cattle | SRR15694522 | <i>C. parvum</i> | I     |
| This study  | CN45011 <sup>*,†,§,¶</sup> | IIdA19G1 | 212.08    | 0.9958           | 52                | 9123057             | 526044  | China-Guangdong | Cattle | SRR15694573 | <i>C. parvum</i> | I     |
| This study  | CN45012                    | IIdA19G1 | 207.84    | 0.9959           | 59                | 9125623             | 489222  | China-Guangdong | Cattle | SRR15694572 | <i>C. parvum</i> | I     |
| This study  | CN45016                    | IIdA19G1 | 179.90    | 0.9957           | 55                | 9113046             | 389601  | China-Guangdong | Cattle | SRR15694561 | <i>C. parvum</i> | I     |
| This study  | CN45017                    | IIdA19G1 | 189.92    | 0.9957           | 81                | 9114623             | 377563  | China-Guangdong | Cattle | SRR15694550 | <i>C. parvum</i> | I     |
| This study  | CN45022                    | IIdA19G1 | 196.94    | 0.9958           | 77                | 9119104             | 255912  | China-Guangdong | Cattle | SRR15694539 | <i>C. parvum</i> | I     |
| This study  | CN6294                     | IIdA19G1 | 194.55    | 0.9939           | 2519              | 10283072            | 151175  | China-Guangdong | Cattle | SRR15694528 | <i>C. parvum</i> | I     |
| This study  | CN22958                    | IIdA19G1 | 88.22     | 0.9935           | 3174              | 10134354            | 155871  | China-Guangdong | Cattle | SRR15694517 | <i>C. parvum</i> | I     |
| This study  | CN22971                    | IIdA19G1 | 91.87     | 0.9936           | 642               | 9297791             | 165889  | China-Guangdong | Cattle | SRR15694506 | <i>C. parvum</i> | I     |
| This study  | CN22972                    | IIdA19G1 | 97.88     | 0.9937           | 766               | 9371599             | 154288  | China-Guangdong | Cattle | SRR15694495 | <i>C. parvum</i> | I     |
| This study  | CN22973                    | IIdA19G1 | 117.79    | 0.9944           | 713               | 9448049             | 229861  | China-Guangdong | Cattle | SRR15694484 | <i>C. parvum</i> | I     |
| PRJNA320419 | CN31727 <sup>*</sup>       | IIdA19G1 | 131.15    | 0.9941           | 195               | 9102487             | 115541  | China-Henan     | Cattle | SRR3473975  | <i>C. parvum</i> | I     |

|            |                            |            |        |        |      |          |        |                      |                |             |                  |     |
|------------|----------------------------|------------|--------|--------|------|----------|--------|----------------------|----------------|-------------|------------------|-----|
| This study | CN35419 <sup>*,§,¶</sup>   | IIdA19G1   | 572.25 | 0.9953 | 85   | 9121358  | 277190 | China-Henan          | GKO mice model | SRR15694552 | <i>C. parvum</i> | I   |
| This study | CNXJ-CP                    | IIdA19G1   | 104.76 | 0.9937 | 3023 | 10568153 | 166037 | China-Henan          | Cattle         | SRR15694551 | <i>C. parvum</i> | I   |
| This study | CN44290 <sup>*,§,¶</sup>   | IIdA19G1   | 305.63 | 0.9963 | 53   | 9125710  | 735705 | China-Jiangsu        | Cattle         | SRR15694548 | <i>C. parvum</i> | I   |
| This study | CN44291                    | IIdA19G1   | 298.87 | 0.9962 | 55   | 9134005  | 410973 | China-Jiangsu        | Cattle         | SRR15694547 | <i>C. parvum</i> | I   |
| This study | CN44298                    | IIdA19G1   | 287.28 | 0.9948 | 248  | 9115440  | 101649 | China-Jiangsu        | Cattle         | SRR15694546 | <i>C. parvum</i> | I   |
| This study | CN11707 <sup>*</sup>       | IIdA20G1   | 182.82 | 0.9941 | 543  | 9250306  | 147454 | China-Heilongjiang   | Cattle         | SRR15694564 | <i>C. parvum</i> | II  |
| This study | CN11722                    | IIdA19G1   | 118.68 | 0.9942 | 1512 | 9890051  | 159500 | China-Heilongjiang   | Cattle         | SRR15694562 | <i>C. parvum</i> | II  |
| This study | CN11730                    | IIdA20G1   | 88.08  | 0.9942 | 1343 | 9647162  | 164303 | China-Heilongjiang   | Cattle         | SRR15694560 | <i>C. parvum</i> | II  |
| This study | CN11738                    | IIdA20G1   | 86.87  | 0.9941 | 1278 | 9634356  | 173609 | China-Heilongjiang   | Cattle         | SRR15694559 | <i>C. parvum</i> | II  |
| This study | CN11744                    | IIdA20G1   | 100.67 | 0.9944 | 5064 | 11796809 | 157673 | China-Heilongjiang   | Cattle         | SRR15694558 | <i>C. parvum</i> | II  |
| This study | CN11760 <sup>*,†,§,¶</sup> | IIdA20G1   | 158.06 | 0.9943 | 393  | 9190902  | 154551 | China-Heilongjiang   | Cattle         | SRR15694563 | <i>C. parvum</i> | II  |
| This study | CN11783                    | IIdA20G1   | 82.01  | 0.9942 | 1375 | 9673954  | 158386 | China-Heilongjiang   | Cattle         | SRR15694557 | <i>C. parvum</i> | II  |
| This study | CN11785                    | IIdA20G1   | 85.58  | 0.9943 | 668  | 9371699  | 157408 | China-Heilongjiang   | Cattle         | SRR15694556 | <i>C. parvum</i> | II  |
| This study | CN9592 <sup>*,§,¶</sup>    | IIdA20G1   | 170.33 | 0.9943 | 484  | 9238425  | 138937 | China-Inner Mongolia | Bactrian Camel | SRR15694549 | <i>C. parvum</i> | II  |
| This study | CN11789                    | IIdA20G1   | 98.14  | 0.9943 | 648  | 9333149  | 157437 | China-Heilongjiang   | Cattle         | SRR15694555 | <i>C. parvum</i> | II  |
| This study | CN12405 <sup>*</sup>       | IIdA20G1   | 80.09  | 0.9928 | 782  | 9331055  | 148802 | China-Hebei          | Cattle         | SRR15694570 | <i>C. parvum</i> | III |
| This study | CN12535                    | IIdA20G1   | 80.63  | 0.9931 | 823  | 9345137  | 134110 | China-Hebei          | Cattle         | SRR15694569 | <i>C. parvum</i> | III |
| This study | CN12536                    | IIdA20G1   | 79.51  | 0.9937 | 653  | 9279294  | 143163 | China-Hebei          | Cattle         | SRR15694568 | <i>C. parvum</i> | III |
| This study | CN24696                    | IIdA20G1   | 110.75 | 0.9943 | 8583 | 13864095 | 134116 | China-Hebei          | Cattle         | SRR15694567 | <i>C. parvum</i> | III |
| This study | CN24716 <sup>*,†,§,¶</sup> | IIdA20G1   | 88.67  | 0.9940 | 731  | 9390991  | 154382 | China-Hebei          | Cattle         | SRR15694566 | <i>C. parvum</i> | III |
| This study | CN24721                    | IIdA20G1   | 94.57  | 0.9944 | 1077 | 9534436  | 171959 | China-Hebei          | Cattle         | SRR15694565 | <i>C. parvum</i> | III |
| This study | CN39904 <sup>*,†,§,¶</sup> | IIdA15G1   | 12.00  | 0.9787 | 1077 | 8807820  | 19195  | China-XinJiang       | Cattle         | SRR15694520 | <i>C. parvum</i> | -   |
| This study | EG34902 <sup>*,§</sup>     | IIdA20G1   | 104.45 | 0.9956 | 104  | 9202795  | 212062 | Egypt                | Cattle         | SRR15694516 | <i>C. parvum</i> | IV  |
| This study | EG43713 <sup>*,†,§</sup>   | IIdA20G1   | 132.80 | 0.9956 | 61   | 9125628  | 336482 | Egypt                | Human          | SRR15694514 | <i>C. parvum</i> | IV  |
| This study | EG35090 <sup>§</sup>       | IIdA15G1R1 | 17.42  | 0.9907 | 656  | 9056186  | 39405  | Egypt                | Cattle         | SRR15694515 | <i>C. parvum</i> | V   |
| This study | EG44409 <sup>*,§</sup>     | IIdA15G1R1 | 152.80 | 0.9963 | 126  | 9131737  | 263713 | Egypt                | Cattle         | SRR15694512 | <i>C. parvum</i> | V   |
| This study | EG44412 <sup>*,§</sup>     | IIdA15G1R1 | 200.20 | 0.9959 | 129  | 9130189  | 245366 | Egypt                | Cattle         | SRR15694511 | <i>C. parvum</i> | V   |
| This study | EG44425 <sup>*,†,§</sup>   | IIdA15G1R1 | 206.81 | 0.9962 | 109  | 9129248  | 265428 | Egypt                | Cattle         | SRR15694510 | <i>C. parvum</i> | V   |
| This study | EG44458 <sup>*,§</sup>     | IIdA15G1R1 | 211.31 | 0.9934 | 492  | 9124046  | 50680  | Egypt                | Cattle         | SRR15694509 | <i>C. parvum</i> | V   |
| This study | EG44492 <sup>*,§</sup>     | IIdA15G1R1 | 230.54 | 0.9958 | 137  | 9160198  | 216140 | Egypt                | Cattle         | SRR15694508 | <i>C. parvum</i> | V   |
| This study | EG44493 <sup>§</sup>       | IIdA15G1R1 | 140.67 | 0.9943 | 2131 | 9490644  | 11037  | Egypt                | Cattle         | SRR15694507 | <i>C. parvum</i> | V   |

|             |              |            |         |        |     |         |        |                  |        |               |                  |      |
|-------------|--------------|------------|---------|--------|-----|---------|--------|------------------|--------|---------------|------------------|------|
| This study  | CZ44619*     | IlaA16G1R1 | 106.24  | 0.9962 | 57  | 9115842 | 327909 | Czech Republic   | Cattle | SRR15694519   | <i>C. parvum</i> | VI   |
| This study  | CZ44621*,†   | IlaA16G1R1 | 88.46   | 0.9962 | 54  | 9116233 | 365301 | Czech Republic   | Human  | SRR15694518   | <i>C. parvum</i> | VI   |
| PRJNA308172 | Uppsala1499* | IlaA16G1R1 | 1105.23 | 0.9959 | 194 | 9124225 | 134156 | Sweden           | Cattle | SRR3091751-61 | <i>C. parvum</i> | VI   |
| PRJNA253848 | UKP8*        | IIdA22G1   | 240.58  | 0.9943 | 411 | 9074754 | 71069  | UK-England       | Human  | SRR6148259    | <i>C. parvum</i> | VI   |
| This study  | US44513*,†,¶ | IIdA15G1   | 191.51  | 0.9964 | 45  | 9123389 | 653246 | USA-Alabama      | Human  | SRR15694483   | <i>C. parvum</i> | -    |
| This study  | US42561*,†,¶ | IlaA15G2R1 | 539.98  | 0.9976 | 46  | 9118496 | 487688 | USA-NewYork      | Cattle | SRR15694505   | <i>C. parvum</i> | VII  |
| This study  | US42429      | IlaA15G2R1 | 365.84  | 0.9973 | 133 | 9116940 | 308087 | USA-Washington   | Cattle | SRR15694504   | <i>C. parvum</i> | VII  |
| This study  | US42554      | IlaA15G2R1 | 447.22  | 0.9973 | 53  | 9117393 | 365249 | USA-Washington   | Cattle | SRR15694503   | <i>C. parvum</i> | VII  |
| This study  | US41886      | IlaA16G3R1 | 64.62   | 0.9962 | 127 | 9088468 | 220027 | USA-Wisconsin    | Cattle | SRR15694502   | <i>C. parvum</i> | VII  |
| This study  | US42562¶     | IlaA14G3R2 | 388.75  | 0.9974 | 36  | 9118212 | 583742 | USA-Colorado     | Cattle | SRR15694500   | <i>C. parvum</i> | VII  |
| This study  | US38783      | IlaA15G2R1 | 256.72  | 0.9962 | 81  | 9098756 | 360396 | USA-Iowa         | Cattle | SRR15694499   | <i>C. parvum</i> | VII  |
| This study  | US41883*,¶   | IlaA15G2R2 | 76.85   | 0.9966 | 68  | 9103353 | 340033 | USA-Iowa         | Cattle | SRR15694498   | <i>C. parvum</i> | VII  |
| This study  | US41560*,¶   | IlaA15G2R1 | 66.51   | 0.9966 | 74  | 9096277 | 412143 | USA-Minnesota    | Cattle | SRR15694497   | <i>C. parvum</i> | VII  |
| This study  | US42435      | IlaA14G1R2 | 504.27  | 0.9977 | 48  | 9120099 | 463248 | USA-Minnesota    | Cattle | SRR15694496   | <i>C. parvum</i> | VII  |
| This study  | US41566      | IlaA15G2R1 | 101.52  | 0.9970 | 55  | 9106202 | 485811 | USA-NewYork      | Cattle | SRR15694493   | <i>C. parvum</i> | VII  |
| This study  | US41889      | IlaA15G2R1 | 87.37   | 0.9968 | 62  | 9100857 | 461240 | USA-NewYork      | Cattle | SRR15694492   | <i>C. parvum</i> | VII  |
| This study  | US42564¶     | IlaA16G3R1 | 474.92  | 0.9975 | 41  | 9120664 | 591984 | USA-Ohio         | Cattle | SRR15694491   | <i>C. parvum</i> | VII  |
| This study  | US41565*,¶   | IlaA15G2R1 | 146.20  | 0.9970 | 53  | 9102599 | 563104 | USA-Pennsylvania | Cattle | SRR15694489   | <i>C. parvum</i> | VII  |
| This study  | US44519¶     | IlaA15G2R1 | 314.54  | 0.9973 | 67  | 9118026 | 333344 | USA-Tennessee    | Cattle | SRR15694488   | <i>C. parvum</i> | VII  |
| This study  | US42556¶     | IlaA17G2R1 | 478.05  | 0.9975 | 50  | 9114216 | 503360 | USA-Washington   | Cattle | SRR15694487   | <i>C. parvum</i> | VII  |
| This study  | US42557      | IlaA17G2R1 | 465.50  | 0.9973 | 58  | 9114383 | 424976 | USA-Washington   | Cattle | SRR15694486   | <i>C. parvum</i> | VII  |
| This study  | US41562¶     | IlaA17G2R1 | 95.38   | 0.9968 | 70  | 9095786 | 333020 | USA-Wisconsin    | Cattle | SRR15694485   | <i>C. parvum</i> | VII  |
| PRJNA439211 | UKP1*        | IlaA17G1R1 | 1004.69 | 0.9972 | 55  | 9211997 | 429156 | UK               | Human  | SRR6871415    | <i>C. parvum</i> | VII  |
| PRJNA253836 | UKP2*        | IlaA19G1R2 | 43.52   | 0.9958 | 147 | 9098259 | 174184 | UK-England       | Human  | SRR6117460    | <i>C. parvum</i> | VII  |
| PRJNA253840 | UKP3*        | IlaA18G2R1 | 113.06  | 0.9952 | 301 | 9081779 | 107032 | UK-Wales         | Human  | SRR6147472    | <i>C. parvum</i> | VII  |
| PRJNA253843 | UKP4         | IlaA15G2R1 | 224.63  | 0.9954 | 285 | 9080095 | 95982  | UK-England       | Human  | SRR6147581    | <i>C. parvum</i> | VII  |
| PRJNA253845 | UKP5         | IlaA15G2R1 | 19.10   | 0.9945 | 560 | 9020719 | 48689  | UK               | Human  | SRR6147587    | <i>C. parvum</i> | VII  |
| PRJNA253846 | UKP6*        | IlaA15G2R1 | 80.52   | 0.9963 | 112 | 9109773 | 200532 | UK               | Human  | SRR6147945    | <i>C. parvum</i> | VII  |
| PRJNA253847 | UKP7*        | IlaA17G1R1 | 98.39   | 0.9922 | 593 | 8990035 | 47383  | UK-England       | Human  | SRR6147964    | <i>C. parvum</i> | VII  |
| This study  | US45179*,¶   | IIdA5G3d   | 259.38  | 0.9954 | 45  | 9102376 | 593612 | USA-Nebraska     | Human  | SRR15694494   | <i>C. parvum</i> | IIdc |
| This study  | US43801*,¶   | IIdA5G3a   | 320.80  | 0.9953 | 80  | 9127151 | 341506 | USA-Oregon       | Human  | SRR15694490   | <i>C. parvum</i> | IIdc |
| This study  | US45175*,†,¶ | IIdA5G3a   | 255.96  | 0.9956 | 47  | 9104505 | 410630 | USA-Alabama      | Human  | SRR15694501   | <i>C. parvum</i> | IIdc |
| This study  | EG43849*     | IIdA5G3a   | 109.73  | 0.9943 | 61  | 9109671 | 387299 | Egypt            | Human  | SRR15694513   | <i>C. parvum</i> | IIdc |
| PRJNA437480 | TU114*       | IIdA5G3b   | 195.30  | 0.9946 | 47  | 9109832 | 406808 | Uganda           | Human  | SRR10996883   | <i>C. parvum</i> | IIdc |

|             |                        |           |        |        |      |         |         |                    |        |             |                   |     |
|-------------|------------------------|-----------|--------|--------|------|---------|---------|--------------------|--------|-------------|-------------------|-----|
| PRJNA315506 | UKP14                  | IlcA5G3a  | 60.83  | 0.9625 | 2276 | 8316505 | 6565    | UK-England         | Human  | SRR6813718  | <i>C. parvum</i>  | Ilc |
| PRJNA315507 | UKP15                  | IlcA5G3a  | 101.79 | 0.9896 | 994  | 8978913 | 23227   | UK-Wales           | Human  | SRR6813719  | <i>C. parvum</i>  | Ilc |
| PRJNA315508 | UKP16 <sup>*,†</sup>   | IlcA5G3j  | 117.30 | 0.9910 | 914  | 8986137 | 24053   | UK-Wales           | Human  | SRR7898459  | <i>C. parvum</i>  | -   |
| This study  | CN11747 <sup>‡</sup>   | IIdA19G1  | 1.17   | 0.4438 | -    | -       | -       | China-Heilongjiang | Cattle | SRR15694553 | <i>C. parvum</i>  | -   |
| This study  | CN11768 <sup>‡</sup>   | IIdA20G1  | 15.61  | 0.6505 | -    | -       | -       | China-Heilongjiang | Cattle | SRR15694554 | <i>C. parvum</i>  | -   |
| This study  | CN45023 <sup>‡</sup>   | IIdA19G1  | 38.61  | 0.9521 | -    | -       | -       | China-Guangdong    | Addax  | SRR15694571 | <i>C. parvum</i>  | -   |
| This study  | CN42649 <sup>‡</sup>   | IIdA19G1  | 52.11  | 0.7297 | -    | -       | -       | China-Shanghai     | Cattle | SRR15694521 | <i>C. parvum</i>  | -   |
| PRJNA315504 | UKP12 <sup>‡</sup>     | IlcA5G3p  | 29.37  | 0.9289 | -    | -       | -       | UK-England         | Human  | SRR6813717  | <i>C. parvum</i>  | -   |
| PRJNA315505 | UKP13 <sup>‡</sup>     | IlcA5G3a  | 51.67  | 0.9023 | -    | -       | -       | UK-England         | Human  | SRR6813716  | <i>C. parvum</i>  | -   |
| PRJNA222836 | TU502 <sup>§,¶</sup>   | IbA10G2   | 91.29  | 0.9895 | 27   | 9088522 | 879981  | Uganda             | Human  | SRR1015747  | <i>C. hominis</i> | OG  |
| PRJNA222837 | UKH1 <sup>§,¶</sup>    | IbA10G2   | 113.06 | 0.9898 | 35   | 9094195 | 1076561 | UK-Wales           | Human  | SRR1015721  | <i>C. hominis</i> | OG  |
| PRJNA252787 | US30976 <sup>§,¶</sup> | IaA28R4   | 446.06 | 0.9898 | 89   | 9058648 | 172076  | USA-Missouri       | Human  | SRR1557959  | <i>C. hominis</i> | OG  |
| PRJNA253838 | UKH4 <sup>§,¶</sup>    | IaA14R3   | 257.25 | 0.9874 | 393  | 9017179 | 72253   | UK                 | Human  | SRR6143718  | <i>C. hominis</i> | OG  |
| PRJNA634705 | Afr1 <sup>§,¶</sup>    | IeA11G3T3 | 196.36 | 0.9907 | 275  | 9031482 | 95430   | Ghana              | Human  | SRR11843813 | <i>C. hominis</i> | OG  |

Note:

\* Genomes selected for ANI analysis.

† Genomes selected for calculating selection pressure.

‡ Not used for following analysis except mapping and assembly.

§ Genomes used for topology weighting of Egypt-IId.

¶ Genomes used for topology weighting of US44513.

**Table S2.** Summary of related pairs identified with Identity By Descent (IBD) within the same subtype family

| Subtype | No. samples | No. all pairs | Percentage of pairs inferred IBD (%) |
|---------|-------------|---------------|--------------------------------------|
| IIa     | 34          | 561           | 26.6                                 |
| IIc     | 8           | 28            | 17.9                                 |
| IIId    | 59          | 1711          | 44.7                                 |

**Table S3.** Summary of related pairs identified with Identity By Descent (IBD) within the same country (samples over 3)

| Country | No. samples | No. all pairs | Percentage of pairs inferred IBD (%) |
|---------|-------------|---------------|--------------------------------------|
| China   | 55          | 1485          | 51.4                                 |
| Egypt   | 10          | 45            | 26.7                                 |
| UK      | 11          | 55            | 38.2                                 |
| USA     | 21          | 210           | 37.6                                 |

**Table S4.** Gene gains and losses in genomes of *Cryptosporidium parvum*

| Chr                     | Gene family                  | <i>C. parvum</i><br>IIa-IOWA | <i>C. parvum</i><br>IIa-CZ44621 | <i>C. parvum</i> IIa-<br>EG44425 | <i>C. parvum</i> IIa-<br>EG43713 | <i>C. parvum</i><br>IIa-<br>CN35419 | <i>C. parvum</i><br>IIa-UKP8 | <i>C. parvum</i><br>IIa-US44513 | <i>C. parvum</i><br>IIc-US45179 | <i>C. parvum</i><br>IIc-UKP16 |   |
|-------------------------|------------------------------|------------------------------|---------------------------------|----------------------------------|----------------------------------|-------------------------------------|------------------------------|---------------------------------|---------------------------------|-------------------------------|---|
| 1                       | dUTP<br>diphosphatase        | cgd1_3860                    | cgd1_3860                       | cgd1_3860                        | cgd1_3860                        | cgd1_3860                           | cgd1_3860                    | cgd1_3860                       | -                               | cgd1_3860                     |   |
| 3                       | SKSR*                        | -                            | cgd3_10<br>paralog              | cgd3_10<br>paralog               | cgd3_10 paralog                  | cgd3_10<br>paralog                  | cgd3_10<br>paralog           | cgd3_10<br>paralog              | -                               | cgd3_10<br>paralog            |   |
| 5                       | Insulinase-like<br>proteases | cgd6_5510_5<br>520 paralog   | cgd6_5510_5<br>520 paralog      | cgd6_5510_552<br>0 paralog       | cgd6_5510_5520<br>paralog        | cgd6_5510_5520<br>paralog           | -                            | -                               | cgd6_5510_5<br>520 paralog      | cgd6_5510_5<br>520 paralog    |   |
|                         |                              | -                            | -                               | cgd3_4260<br>paralog             | cgd3_4260<br>paralog             | cgd3_4260<br>paralog                | -                            | -                               | -                               | -                             |   |
|                         | MEDLE secreted<br>proteins   | cgd6_5480                    | cgd6_5480                       | -                                | -                                | -                                   | -                            | cgd6_5480                       | cgd6_5480                       | -                             |   |
|                         |                              | cgd6_5490                    | cgd6_5490                       | cgd6_5490                        | cgd6_5490                        | cgd6_5490                           | cgd6_5490                    | cgd6_5490                       | cgd6_5490                       | cgd6_5490                     |   |
| Hypothetical<br>protein | cgd6_5470                    | cgd6_5470                    | cgd6_5470                       | cgd6_5470                        | cgd6_5470                        | cgd6_5470                           | cgd6_5470                    | cgd6_5470                       | cgd6_5470                       | cgd6_5470                     |   |
|                         | cgd6_5500                    | cgd6_5500                    | cgd6_5500                       | cgd6_5500                        | cgd6_5500                        | cgd6_5500                           | cgd6_5500                    | cgd6_5500                       | cgd6_5500                       | cgd6_5500                     |   |
| 6                       | Insulinase-like<br>proteases | cgd6_5510_5<br>520           | cgd6_5510_5<br>520              | cgd6_5510_552<br>0 paralog       | cgd6_5510_5520<br>paralog        | cgd6_5510_5520<br>paralog           | cgd6_5510_5<br>520 paralog   | cgd6_5510_5<br>520 paralog      | -                               | -                             |   |
|                         | Hypothetical<br>protein      | cgd6_5500                    | cgd6_5500                       | cgd6_5500                        | cgd6_5500                        | cgd6_5500                           | cgd6_5500                    | cgd6_5500                       | -                               | cgd6_5500                     |   |
| 7                       | MEDLE secreted<br>proteins   | cgd5_4580                    | cgd5_4580                       | cgd5_4580                        | cgd5_4580                        | cgd5_4580                           | cgd5_4580                    | cgd5_4580                       | cgd5_4580                       | cgd5_4580                     |   |
|                         |                              | cgd5_4590                    | cgd5_4590                       | cgd5_4590                        | cgd5_4590                        | cgd5_4590                           | cgd5_4590                    | cgd5_4590                       | cgd5_4590                       | cgd5_4590                     |   |
|                         |                              | cgd5_4600                    | cgd5_4600                       | cgd5_4600<br>paralog             | cgd5_4600                        | cgd5_4600                           | cgd5_4600                    | cgd5_4600                       | cgd5_4600                       | cgd5_4600                     | - |
|                         |                              | -                            | cgd5_4600<br>paralog            | -                                | -                                | -                                   | -                            | cgd5_4610<br>paralog            | -                               | -                             |   |
|                         | cgd5_4610                    | cgd5_4610                    | cgd5_4610<br>paralog            | cgd5_4610                        | cgd5_4610                        | cgd5_4610                           | cgd5_4610                    | cgd5_4610                       | cgd5_4610                       | cgd5_4610                     |   |
| Subtotal                | MEDLE secreted<br>proteins   | 6                            | 7                               | 5                                | 5                                | 5                                   | 5                            | 7                               | 6                               | 4                             |   |
|                         | Insulinase-like<br>proteases | 2                            | 2                               | 3                                | 3                                | 3                                   | 1                            | 1                               | 1                               | 1                             |   |

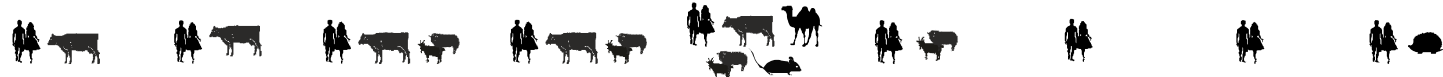



**Table S5.** Information of genes under positive selection among 11 selected *Cryptosporidium parvum* genomes

| Chr       | Gene name     | dN/dS | # SNPs  | Pi value              | Subcellular location prediction | Signal peptide prediction | Product                                                                     |
|-----------|---------------|-------|---------|-----------------------|---------------------------------|---------------------------|-----------------------------------------------------------------------------|
| 1         | cgd1_120      | 2.11  | 49      | 0.01501               | Endoplasmic reticulum           | Yes                       | Hypothetical protein                                                        |
|           | cgd1_130      | 1.37  | 47      | 0.01024               | Extracellular                   | Yes                       | Hypothetical protein                                                        |
|           | cgd1_620      | 1.52  | 19      | 0.00326               | Golgi apparatus                 | Yes                       | Hypothetical protein                                                        |
|           | cgd1_1260     | 1.31  | 6       | 0.00097               | Extracellular                   | Yes                       | Hypothetical protein                                                        |
|           | cgd1_2810     | 1.04  | 6       | 0.0008                | Nucleus                         | No                        | Hypothetical protein                                                        |
|           | cgd1_3090     | 1.81  | 8       | 0.00196               | Nucleus                         | No                        | Hypothetical protein                                                        |
|           | cgd1_3120     | 1.11  | 6       | 0.00055               | Cytoplasm                       | No                        | Peptide synthase-like condensation domain                                   |
|           | cgd1_3180     | 1.06  | 5       | 0.00098               | Cytoplasm                       | No                        | Hypothetical protein                                                        |
| 2         | cgd2_450      | 3.16  | 39      | 0.00232               | Extracellular                   | Yes                       | Mucin-like protein                                                          |
|           | cgd2_410      | 1.89  | 18      | 0.00393               | Extracellular                   | Yes                       | Mucin-like protein                                                          |
|           | cgd2_400      | 2.29  | 4       | 0.0012                | Extracellular                   | Yes                       | Mucin-like protein                                                          |
|           | cgd2_940      | 2.45  | 13      | 0.00068               | Cell membrane                   | Yes                       | Signal peptide plus transmembrane domain or GPI anchor                      |
|           | cgd2_1380     | 1.03  | 5       | 0.00152               | Mitochondrion                   | No                        | Hypothetical protein                                                        |
|           | cgd2_1710     | 1.08  | 6       | 0.00027               | Lysosome/Vacuole                | No                        | Putative signal peptide protein and transmembrane domain containing protein |
|           | cgd2_1720     | 1.19  | 6       | 0.00091               | Cytoplasm                       | No                        | Hypothetical protein                                                        |
|           | cgd2_3330     | 1.48  | 8       | 0.00044               | Endoplasmic reticulum           | Yes                       | APG-1-like HSP70 domain-containing protein                                  |
|           | cgd2_3460     | 1.07  | 5       | 0.00042               | Nucleus                         | No                        | Zinc finger-containing and myb DNA binding domain-containing protein        |
|           | cgd2_4370     | 3.32  | 43      | 0.00872               | Endoplasmic reticulum           | No                        | Signal peptide-containing protein                                           |
| 3         | cgd3_1580     | 1.89  | 9       | 0.00044               | Cytoplasm                       | No                        | Hypothetical protein                                                        |
|           | cgd3_1690     | 2.08  | 28      | 0.00483               | Endoplasmic reticulum           | Yes                       | Hypothetical protein                                                        |
|           | cgd3_1700     | 1.04  | 13      | 0.00143               | Extracellular                   | No                        | Hypothetical protein                                                        |
|           | cgd3_1710     | 4.21  | 15      | 0.0035                | Extracellular                   | Yes                       | Hypothetical protein                                                        |
|           | cgd3_1770     | 1.44  | 37      | 0.0054                | Endoplasmic reticulum           | Yes                       | Hypothetical protein                                                        |
|           | cgd3_1780     | 1.76  | 28      | 0.00332               | Endoplasmic reticulum           | Yes                       | Hypothetical protein                                                        |
|           | cgd3_3420     | 1.38  | 6       | 0.00125               | Lysosome/Vacuole                | No                        | Transmembrane domain and EF hand containing protein                         |
|           | cgd3_3650     | 1.33  | 6       | 0.00087               | Cytoplasm                       | No                        | Centrin-like EF hand protein                                                |
| cgd3_3700 | 1.23          | 6     | 0.00043 | Endoplasmic reticulum | No                              | Hypothetical protein      |                                                                             |
| 4         | cgd4_1110     | 1.07  | 13      | 0.00084               | Cytoplasm                       | No                        | Hypothetical protein                                                        |
|           | cgd4_1140     | 1.6   | 9       | 0.00115               | Cytoplasm                       | No                        | Hypothetical protein                                                        |
|           | cgd4_3880     | 1.62  | 9       | 0.00174               | Cytoplasm                       | No                        | Emap RNA binding domain-containing protein                                  |
|           | cgd4_3720     | 1.08  | 5       | 0.00033               | Cytoplasm                       | No                        | Putative TPR domain-containing protein                                      |
|           | cgd4_3670     | 1.66  | 15      | 0.00322               | Nucleus                         | No                        | Hypothetical protein                                                        |
|           | cgd4_3420     | 1.92  | 9       | 0.00081               | Cytoplasm                       | No                        | Putative Vps53-N protein                                                    |
|           | CPATCC_001824 | 1.41  | 6       | 0.00069               | Cytoplasm                       | No                        | Hypothetical protein                                                        |
|           | cgd4_1850     | 1.34  | 7       | 0.00067               | Cytoplasm                       | No                        | RNAse Ccr4p                                                                 |
| cgd4_4300 | 1.72          | 7     | 0.00061 | Cytoplasm             | No                              | Beta adaptin              |                                                                             |

|           |               |       |         |               |                       |                                                     |                                                                 |
|-----------|---------------|-------|---------|---------------|-----------------------|-----------------------------------------------------|-----------------------------------------------------------------|
| 5         | cgd5_5470     | 1.42  | 53      | 0.02608       | Extracellular         | No                                                  | Putative signal peptide-containing protein                      |
|           | cgd5_20       | 2.44  | 11      | 0.00079       | Extracellular         | Yes                                                 | Signal peptide containing protein                               |
|           | cgd5_50       | 1.67  | 15      | 0.00111       | Nucleus               | No                                                  | Signal peptide containing protein                               |
|           | cgd5_1660     | 1.09  | 5       | 0.00049       | Golgi apparatus       | Yes                                                 | Putative signal peptide-containing protein and acidic stretch   |
|           | cgd5_2100     | 1.09  | 7       | 0.00079       | Endoplasmic reticulum | No                                                  | DNA methyltransferase PMT1-like protein                         |
|           | cgd5_2560     | 1.02  | 9       | 0.00059       | Cytoplasm             | No                                                  | MutL-like ATPase                                                |
|           | cgd5_4040     | 1.24  | 9       | 0.00058       | Nucleus               | No                                                  | Hypothetical protein                                            |
|           | cgd5_3820     | 1.29  | 6       | 0.00109       | Endoplasmic reticulum | No                                                  | Vacuole membrane protein%2C VMP1 like integral membrane protein |
|           | CPATCC_002492 | 1.55  | 7       | 0.0015        | Extracellular         | No                                                  | Hypothetical protein                                            |
| 6         | cgd6_160      | 1.05  | 4       | 0.00049       | Cytoplasm             | No                                                  | Hypothetical protein                                            |
|           | cgd6_1040     | 1     | 8       | 0.00216       | Nucleus               | No                                                  | RNAse P Rpr2/Rpp21 subunit domain                               |
|           | cgd6_1130     | 1.09  | 5       | 0.0005        | Endoplasmic reticulum | Yes                                                 | Putative signal peptide-containing protein                      |
|           | cgd6_2860     | 1.03  | 5       | 0.00079       | Cytoplasm             | No                                                  | Putative coiled coil protein                                    |
|           | cgd6_3160     | 2.98  | 14      | 0.00086       | Cytoplasm             | No                                                  | Hypothetical protein                                            |
|           | cgd6_3200     | 1.27  | 9       | 0.00105       | Cytoplasm             | No                                                  | Hypothetical protein                                            |
|           | cgd6_3600     | 1.03  | 5       | 0.00121       | Nucleus               | No                                                  | Hypothetical protein                                            |
|           | cgd6_4090     | 1.29  | 7       | 0.00134       | Cytoplasm             | No                                                  | Hypothetical protein                                            |
|           | cgd6_4640     | 1.58  | 10      | 0.00088       | Endoplasmic reticulum | Yes                                                 | Hypothetical protein                                            |
| cgd6_5320 | 2             | 8     | 0.00062 | Cytoplasm     | No                    | Hypothetical protein                                |                                                                 |
| 7         | cgd7_930      | 1.37  | 6       | 0.00077       | Endoplasmic reticulum | No                                                  | Membrane domain-containing protein                              |
|           | cgd7_1350     | 1.13  | 5       | 0.00087       | Cell membrane         | No                                                  | Signal peptide-containing protein                               |
|           | cgd7_1370     | 1.11  | 4       | 0.00125       | Endoplasmic reticulum | Yes                                                 | Hypothetical protein                                            |
|           | cgd7_2230     | 1.34  | 6       | 0.0006        | Cytoplasm             | No                                                  | Coiled coil-containing protein                                  |
|           | cgd7_2600     | 1.69  | 15      | 0.00063       | Cytoplasm             | No                                                  | Hypothetical protein                                            |
|           | cgd7_2830     | 1.08  | 5       | 0.0005        | Cytoplasm             | No                                                  | Hypothetical protein                                            |
|           | cgd7_2880     | 1.11  | 5       | 0.00092       | Cytoplasm             | No                                                  | SLBP-like protein                                               |
|           | cgd7_4710     | 1.2   | 7       | 0.00142       | Cytoplasm             | No                                                  | Hypothetical protein                                            |
| cgd7_5470 | 1.45          | 4     | 0.00045 | Cytoplasm     | No                    | Hypothetical protein                                |                                                                 |
| 8         | cgd8_60       | 10.77 | 23      | 0.00864       | Extracellular         | Yes                                                 | Signal peptide-containing protein                               |
|           | cgd8_380      | 1.67  | 9       | 0.00136       | Mitochondrion         | No                                                  | Putative oxidase or dehydrogenase                               |
|           | cgd8_770      | 1.63  | 7       | 0.0005        | Cytoplasm             | No                                                  | Hypothetical protein                                            |
|           | cgd8_1620     | 1.28  | 6       | 0.00074       | Nucleus               | No                                                  | DNA polymerase delta2                                           |
|           | cgd8_2450     | 1.22  | 12      | 0.0007        | Cytoplasm             | No                                                  | Formin homology 2 domain (FH2) protein                          |
|           | cgd8_4540     | 1.06  | 6       | 0.00039       | Cytoplasm             | No                                                  | Putative coiled coil-containing protein                         |
|           | cgd8_4570     | 1.01  | 4       | 0.0007        | Lysosome/Vacuole      | No                                                  | Transmembrane domain-containing protein                         |
|           | cgd8_4640     | 1.56  | 6       | 0.00141       | Nucleus               | No                                                  | WD40 repeat                                                     |
|           | cgd8_5210     | 1.34  | 13      | 0.00039       | Cytoplasm             | No                                                  | Hypothetical protein                                            |
|           | cgd8_5300     | 1.43  | 13      | 0.00065       | Endoplasmic reticulum | Yes                                                 | Signal peptide containing protein                               |
| cgd8_5380 | 1.01          | 37    | 0.00122 | Extracellular | Yes                   | Putative signal peptide-containing secreted protein |                                                                 |

**Table S6.** Information of polymorphic genes under purifying selection among 11 selected *Cryptosporidium parvum* genomes

| Chr | Gene name          | # SNPs | dN/dS | Pi value | Subcellular location prediction | Signal peptide prediction | Product                                             |
|-----|--------------------|--------|-------|----------|---------------------------------|---------------------------|-----------------------------------------------------|
| 1   | cgd1_120           | 49     | 2.113 | 0.015    | Endoplasmic reticulum           | Yes                       | Hypothetical protein                                |
|     | cgd1_130           | 44     | 1.366 | 0.010    | Extracellular                   | Yes                       | Hypothetical protein                                |
|     | cgd1_460           | 47     | 0.278 | 0.012    | Cytoplasm                       | No                        | Hypothetical protein                                |
|     | cgd1_470           | 204    | 0.963 | 0.033    | Extracellular                   | Yes                       | Mucin-like protein                                  |
|     | cgd1_480           | 18     | 0.244 | 0.018    | Mitochondrion                   | No                        | Hypothetical protein                                |
|     | cgd1_530           | 7      | 0.000 | 0.011    | Mitochondrion                   | No                        | Hypothetical protein                                |
| 2   | cgd2_420           | 32     | -     | 0.010    | Extracellular                   | Yes                       | Mucin-like protein                                  |
| 4   | cgd4_10            | 20     | -     | 0.025    | Nucleus                         | No                        | Hypothetical protein                                |
|     | cgd4_20            | 47     | 0.252 | 0.021    | Endoplasmic reticulum           | Yes                       | Putative signal peptide-containing protein          |
|     | cgd4_4500          | 242    | -     | 0.022    | Extracellular                   | Yes                       | Signal peptide containing cysteine rich protein     |
|     | CPATCC_001985      | 70     | -     | 0.017    | Mitochondrion                   | No                        | Hypothetical protein                                |
| 5   | cgd6_5500          | 46     | -     | 0.027    | Cytoplasm                       | No                        | Hypothetical protein                                |
|     | cgd5_5490          | 16     | -     | 0.010    | Extracellular                   | Yes                       | Hypothetical protein                                |
|     | cgd5_5470          | 53     | 1.418 | 0.026    | Extracellular                   | No                        | Putative signal peptide-containing protein          |
| 6   | chro.60010 homolog | 52     | -     | 0.015    | Cytoplasm                       | No                        | Hypothetical protein                                |
|     | cgd6_40            | 37     | -     | 0.025    | Extracellular                   | Yes                       | Hypothetical protein                                |
|     | cgd6_60            | 251    | 0.423 | 0.011    | Extracellular                   | No                        | Putative signal peptide-containing protein          |
|     | cgd6_1060          | 51     | 0.316 | 0.010    | Nucleus                         | No                        | Spectrin repeat-containing protein                  |
|     | cgd6_1070          | 22     | 0.189 | 0.011    | Endoplasmic reticulum           | No                        | Hypothetical protein                                |
|     | cgd6_1080          | 94     | 0.556 | 0.039    | Cell membrane                   | Yes                       | Hypothetical protein                                |
|     | cgd6_5270          | 50     | 0.855 | 0.019    | Extracellular                   | Yes                       | Putative signal peptide-containing protein          |
| 7   | cgd7_4531          | 31     | -     | 0.013    | Endoplasmic reticulum           | Yes                       | Signal peptide-containing protein                   |
|     | cgd7_4330          | 137    | -     | 0.014    | Cell membrane                   | No                        | Putative glycoprotein                               |
|     | cgd7_4500          | 104    | 0.864 | 0.014    | Extracellular                   | Yes                       | Signal peptide-containing secreted protein          |
| 8   | cgd8_10            | 107    | -     | 0.024    | Cytoplasm                       | No                        | Hypothetical protein                                |
|     | cgd8_20            | 241    | -     | 0.017    | Golgi apparatus                 | Yes                       | Putative secreted signal peptide-containing protein |
|     | cgd8_30            | 219    | -     | 0.015    | Endoplasmic reticulum           | Yes                       | Putative secreted signal peptide-containing protein |
|     | cgd8_40            | 134    | -     | 0.012    | Endoplasmic reticulum           | Yes                       | Putative secreted signal peptide-containing protein |

**Table S7.** List of genes with over 3 SNPs in zoonotic *Cryptosporidium parvum* (IIa and IIc genomes) within regions under selective sweep in IIa

| Chr       | Gene ID   | Number of SNPs |     |                                         | Product                                                         |
|-----------|-----------|----------------|-----|-----------------------------------------|-----------------------------------------------------------------|
|           |           | All genomes    | IIa | IIc                                     |                                                                 |
| 2         | cgd2_690  | 8              | 1   | 6                                       | Lycine-rich repeat-containing protein                           |
|           | cgd2_700  | 6              | 4   | 4                                       | PMS1/MutL-like ATPase'                                          |
|           | cgd2_1970 | 4              | 2   | 2                                       | Hypothetical protein                                            |
| 3         | cgd3_2080 | 8              | 4   | 5                                       | Transmembrane domain-containing protein                         |
|           | cgd3_2120 | 4              | 2   | 2                                       | Myosin fused to Q motif and Rcc1 domain                         |
|           | cgd3_2180 | 16             | 5   | 13                                      | Type I fatty acid synthase                                      |
|           | cgd3_2730 | 4              | 2   | 2                                       | Transmembrane domain-containing protein                         |
|           | cgd3_2960 | 5              | 3   | 2                                       | Hypothetical protein                                            |
|           | cgd3_3060 | 4              | 1   | 3                                       | Putative exportin 1                                             |
|           | cgd3_3560 | 4              | 0   | 4                                       | Magnesium transporter CorA-like protein                         |
|           | cgd3_3570 | 11             | 4   | 7                                       | Similar to 80 kDa MCM3-associated protein                       |
|           | cgd3_3600 | 4              | 0   | 4                                       | Hypothetical protein                                            |
| cgd3_3620 | 12        | 3              | 10  | Transmembrane domain-containing protein |                                                                 |
| 4         | cgd4_440  | 6              | 1   | 5                                       | Flap endonuclease                                               |
| 6         | cgd6_4700 | 9              | 3   | 6                                       | ATP-binding cassette transporter                                |
|           | cgd6_4730 | 4              | 3   | 1                                       | Transmembrane domain-containing protein                         |
|           | cgd6_4750 | 22             | 2   | 19                                      | Splicing factor 3B subunit1-like HEAT repeat-containing protein |
|           | cgd6_4760 | 5              | 0   | 1                                       | Tubulin beta chain                                              |
|           | cgd6_4770 | 4              | 0   | 4                                       | Similar to cell cycle control protein cwf2                      |
|           | cgd6_4780 | 6              | 0   | 6                                       | Putative transmembrane domain-containing protein                |
|           | cgd6_4790 | 11             | 1   | 10                                      | Putative Zn finger-containing protein                           |
|           | cgd6_4800 | 6              | 0   | 5                                       | Hypothetical protein                                            |
|           | cgd6_4830 | 7              | 2   | 4                                       | Drs1p                                                           |
|           | cgd6_4840 | 11             | 6   | 7                                       | Serine protease                                                 |
|           | cgd6_4850 | 7              | 1   | 6                                       | PRP19 non-snRNP spliceosome component required for DNA repair   |
|           | cgd6_4860 | 5              | 1   | 4                                       | Nucleolar protein GU2                                           |
|           | cgd6_4910 | 6              | 1   | 5                                       | CCCH RNA binding domains-containing protein                     |
|           | cgd6_4920 | 4              | 0   | 4                                       | Transmembrane domain-containing protein                         |
|           | cgd6_4930 | 7              | 1   | 6                                       | Beta-adaptin AP complex subunit-related protein                 |
| cgd6_5190 | 4         | 1              | 3   | Hypothetical protein                    |                                                                 |
| 8         | cgd8_3040 | 5              | 2   | 3                                       | Putative transmembrane domain-containing protein                |

**Table S8.** List of genes with over 3 SNPs in zoonotic *Cryptosporidium parvum* (IIa and IIc genomes) within regions under selective sweep in IIc

| Chr       | Gene ID            | Number of SNPs |     |                                   | Product                                                             |
|-----------|--------------------|----------------|-----|-----------------------------------|---------------------------------------------------------------------|
|           |                    | All genomes    | IIa | IIc                               |                                                                     |
| 1         | cgd1_470           | 90             | 1   | 0                                 | Mucin-like protein                                                  |
|           | cgd1_480           | 18             | 0   | 0                                 | Hypothetical protein                                                |
|           | cgd1_490           | 7              | 0   | 0                                 | Hypothetical protein                                                |
|           | cgd1_500           | 16             | 15  | 0                                 | Hypothetical protein                                                |
|           | cgd1_510           | 24             | 24  | 0                                 | Hypothetical protein                                                |
|           | cgd1_530           | 6              | 6   | 0                                 | Hypothetical protein                                                |
|           | cgd1_540           | 5              | 5   | 0                                 | Putative signal peptide-containing vacuolar ATP synthase subunit    |
|           | CMU_005380 homolog | 10             | 10  | 0                                 | Hypothetical protein                                                |
|           | cgd1_550           | 41             | 41  | 1                                 | Putative signal peptide-containing secreted protein                 |
|           | cgd1_1040          | 4              | 4   | 0                                 | Hypothetical protein                                                |
|           | cgd1_1250          | 15             | 15  | 1                                 | Putative signal peptide-containing secreted protein                 |
|           | cgd1_1300          | 4              | 4   | 0                                 | Hypothetical protein                                                |
|           | cgd1_1640          | 9              | 8   | 1                                 | AT hook and a PHD finger domain-containing chromatin protein        |
| cgd1_3170 | 6                  | 6              | 0   | Hypothetical protein              |                                                                     |
| 2         | cgd2_80            | 6              | 6   | 0                                 | Putative ABC transporter-like protein                               |
|           | cgd2_60            | 8              | 8   | 0                                 | Hypothetical protein                                                |
|           | cgd2_2320          | 4              | 3   | 1                                 | Ferlin-like protein                                                 |
|           | cgd2_2360          | 4              | 3   | 0                                 | Dop1p-like protein                                                  |
|           | cgd2_2680          | 4              | 4   | 1                                 | Putative magnesium-transporting ATPase                              |
|           | cgd2_3090          | 5              | 5   | 0                                 | Putative signal peptide protein                                     |
|           | cgd2_4250          | 4              | 4   | 0                                 | Putative tuftelin-interacting protein                               |
| 3         | cgd3_950           | 4              | 4   | 0                                 | Hypothetical protein                                                |
|           | cgd3_1780          | 5              | 5   | 0                                 | Hypothetical protein                                                |
|           | cgd3_1800          | 4              | 4   | 0                                 | Transmembrane domain-containing protein                             |
|           | cgd3_4190          | 8              | 8   | 1                                 | Secreted insulinase-like peptidase                                  |
|           | cgd3_4200          | 4              | 4   | 0                                 | Signal peptide-containing secreted insulinase-like peptidase        |
|           | cgd4_510           | 8              | 8   | 1                                 | Hypothetical protein                                                |
| 4         | cgd4_550           | 4              | 3   | 1                                 | Hypothetical protein                                                |
|           | cgd4_1350          | 4              | 4   | 0                                 | Regulator of chromosome condensation                                |
|           | cgd4_3630          | 15             | 15  | 0                                 | Hypothetical protein                                                |
|           | cgd4_3610          | 4              | 4   | 0                                 | Putative signal peptide-containing protein                          |
|           | cgd4_3530          | 6              | 5   | 1                                 | Putative signal peptide-containing protein                          |
|           | cgd4_2900          | 17             | 13  | 2                                 | Polyketide synthase                                                 |
|           | cgd4_2850          | 4              | 4   | 0                                 | Hypothetical protein                                                |
|           | cgd4_2690          | 9              | 9   | 0                                 | Sec7 domain-containing protein                                      |
|           | cgd4_2670          | 17             | 16  | 0                                 | FRP1 like and phosphatidylinositol kinase domain-containing protein |
|           | cgd4_2470          | 9              | 8   | 0                                 | Putative signal peptide-containing protein                          |
| cgd4_2150 | 5                  | 4              | 0   | Hypothetical protein              |                                                                     |
| 5         | cgd5_5460          | 16             | 15  | 1                                 | Hypothetical protein                                                |
|           | cgd5_810           | 4              | 3   | 1                                 | Leucine-rich repeat protein                                         |
|           | cgd5_2540          | 7              | 7   | 0                                 | WD repeat protein                                                   |
|           | cgd5_2580          | 6              | 5   | 1                                 | Putative signal peptide-containing protein                          |
| 6         | cgd6_40            | 34             | 34  | 0                                 | Hypothetical protein                                                |
|           | cgd6_50            | 22             | 22  | 0                                 | Hypothetical protein                                                |
|           | cgd6_60            | 4              | 3   | 1                                 | Putative signal peptide-containing protein                          |
|           | cgd6_730           | 4              | 4   | 0                                 | 14-3-3 domain-containing protein                                    |
|           | cgd6_880           | 8              | 7   | 1                                 | Glycogen debranching enzyme Gdb1p                                   |
|           | cgd6_2790          | 5              | 5   | 0                                 | Putative kinesin heavy chain                                        |
|           | cgd6_3040          | 6              | 6   | 0                                 | Hypothetical protein                                                |
|           | cgd6_3050          | 11             | 11  | 0                                 | Putative signal peptide-containing protein                          |
|           | cgd6_3690          | 4              | 4   | 0                                 | Putative PUG and UBX domain-containing protein                      |
| cgd6_3730 | 8                  | 7              | 1   | Signal peptide-containing protein |                                                                     |

|   |           |    |    |   |                                            |
|---|-----------|----|----|---|--------------------------------------------|
|   | cgd6_3760 | 4  | 4  | 0 | Hypothetical protein                       |
| 7 | cgd7_1340 | 4  | 4  | 0 | Hypothetical protein                       |
|   | cgd7_1550 | 4  | 4  | 0 | Hypothetical protein                       |
|   | cgd7_1630 | 7  | 7  | 0 | Putative RNA methylase                     |
|   | cgd7_2340 | 6  | 6  | 0 | Signal peptide-containing protein          |
|   | cgd7_4310 | 8  | 5  | 1 | Signal peptide-containing protein          |
|   | cgd7_4600 | 4  | 3  | 0 | Abstrakt protein SF II helicase            |
|   | cgd7_4990 | 13 | 13 | 1 | Ubiquitin ligase                           |
| 8 | cgd8_550  | 4  | 4  | 0 | Hypothetical protein                       |
|   | cgd8_810  | 10 | 9  | 1 | Hypothetical protein                       |
|   | cgd8_850  | 6  | 6  | 0 | Putative membrane associated protein       |
|   | cgd8_870  | 5  | 5  | 0 | DNA dependent DNA polymerase alpha subunit |
|   | cgd8_900  | 5  | 4  | 0 | Utp6p-like protein                         |
|   | cgd8_1340 | 11 | 9  | 2 | Hypothetical protein                       |
|   | cgd8_4620 | 8  | 7  | 1 | ISWI related chromatinic protein           |
